# Supplementary material for: Synthesis, Characterization, and Antifungal Activity of Novel Benzo[4,5]imidazo[1,2-d][1,2,4]triazine Derivatives
Source: PubMed Central journal article supplement (PMC6017302; doi:10.3390/molecules23040746), 2018-03-23
Supplement: molecules-23-00746-s001.pdf [file molecules-23-00746-s001.pdf]

Supporting Information For:

# Synthesis, Characterization and Antifungal Activity of Novel Benzo[4,5]imidazo[1,2-*d*][1,2,4]triazine Derivatives

Ling-Xia Li<sup>1,2,†</sup>, Jian Jiao<sup>1,2,†</sup>, Xiao-Bin Wang<sup>1</sup>, Min Chen<sup>1,2</sup>, Xin-Can Fu<sup>1</sup>, Wei-Jie Si<sup>1,3</sup> and Chun-Long Yang<sup>1,2,3,\*</sup>

<sup>1</sup> College of Sciences, Nanjing Agricultural University, Nanjing 210095, China;

2014111007@njau.edu.cn (L.-X. Li); 2015111008@njau.edu.cn (J. Jiao)

<sup>2</sup> Jiangsu Key Laboratory of Pesticide Science, Nanjing Agricultural University, Nanjing 210095, China;

<sup>3</sup> Key Laboratory of Monitoring and Management of Crop Diseases and Pest Insects, Ministry of Agriculture, Nanjing Agricultural University, Nanjing 210095, China;

\* Correspondence: ycl@njau.edu.cn (C.-L. Yang); Tel.: +86-25-8439-5207; Fax: +86-25-8439-5207.

† These authors contributed equally to this paper.

## Contents

|                                                             |    |
|-------------------------------------------------------------|----|
| 1. <sup>1</sup> H NMR spectra of compound <b>4a</b> .....   | 4  |
| 2. <sup>13</sup> C NMR spectra of compound <b>4a</b> .....  | 4  |
| 3. EI-MS spectra of compound <b>4a</b> .....                | 5  |
| 4. FT-IR spectra of compound <b>4a</b> .....                | 5  |
| 5. <sup>1</sup> H NMR spectra of compound <b>4b</b> .....   | 6  |
| 6. <sup>13</sup> C NMR spectra of compound <b>4b</b> .....  | 6  |
| 7. EI-MS spectra of compound <b>4b</b> .....                | 7  |
| 8. FT-IR spectra of compound <b>4b</b> .....                | 7  |
| 9. <sup>1</sup> H NMR spectra of compound <b>4c</b> .....   | 8  |
| 10. <sup>13</sup> C NMR spectra of compound <b>4c</b> ..... | 8  |
| 11. EI-MS spectra of compound <b>4c</b> .....               | 9  |
| 12. FT-IR spectra of compound <b>4c</b> .....               | 9  |
| 13. <sup>1</sup> H NMR spectra of compound <b>4d</b> .....  | 9  |
| 14. <sup>13</sup> C NMR spectra of compound <b>4d</b> ..... | 10 |
| 15. EI-MS spectra of compound <b>4d</b> .....               | 10 |
| 16. FT-IR spectra of compound <b>4d</b> .....               | 11 |
| 17. <sup>1</sup> H NMR spectra of compound <b>4e</b> .....  | 11 |
| 18. <sup>13</sup> C NMR spectra of compound <b>4e</b> ..... | 12 |
| 19. EI-MS spectra of compound <b>4e</b> .....               | 12 |
| 20. FT-IR spectra of compound <b>4e</b> .....               | 13 |
| 21. <sup>1</sup> H NMR spectra of compound <b>4f</b> .....  | 13 |
| 22. <sup>13</sup> C NMR spectra of compound <b>4f</b> ..... | 14 |
| 23. EI-MS spectra of compound <b>4f</b> .....               | 14 |

|                                                             |    |
|-------------------------------------------------------------|----|
| 24. FT-IR spectra of compound <b>4f</b> .....               | 15 |
| 25. <sup>1</sup> H NMR spectra of compound <b>4g</b> .....  | 15 |
| 26. <sup>13</sup> C NMR spectra of compound <b>4g</b> ..... | 16 |
| 27. EI-MS spectra of compound <b>4g</b> .....               | 16 |
| 28. FT-IR spectra of compound <b>4g</b> .....               | 17 |
| 29. <sup>1</sup> H NMR spectra of compound <b>4h</b> .....  | 17 |
| 30. <sup>13</sup> C NMR spectra of compound <b>4h</b> ..... | 18 |
| 31. EI-MS spectra of compound <b>4h</b> .....               | 18 |
| 32. FT-IR spectra of compound <b>4h</b> .....               | 19 |
| 33. <sup>1</sup> H NMR spectra of compound <b>4i</b> .....  | 19 |
| 34. <sup>13</sup> C NMR spectra of compound <b>4i</b> ..... | 20 |
| 35. EI-MS spectra of compound <b>4i</b> .....               | 20 |
| 36. FT-IR spectra of compound <b>4i</b> .....               | 21 |
| 37. <sup>1</sup> H NMR spectra of compound <b>4j</b> .....  | 21 |
| 38. <sup>13</sup> C NMR spectra of compound <b>4j</b> ..... | 21 |
| 39. EI-MS spectra of compound <b>4j</b> .....               | 22 |
| 40. FT-IR spectra of compound <b>4j</b> .....               | 23 |
| 41. <sup>1</sup> H NMR spectra of compound <b>4k</b> .....  | 23 |
| 42. <sup>13</sup> C NMR spectra of compound <b>4k</b> ..... | 24 |
| 43. EI-MS spectra of compound <b>4k</b> .....               | 24 |
| 44. FT-IR spectra of compound <b>4k</b> .....               | 25 |
| 45. <sup>1</sup> H NMR spectra of compound <b>4l</b> .....  | 25 |
| 46. <sup>13</sup> C NMR spectra of compound <b>4l</b> ..... | 26 |
| 47. EI-MS spectra of compound <b>4l</b> .....               | 26 |
| 48. FT-IR spectra of compound <b>4l</b> .....               | 27 |
| 49. <sup>1</sup> H NMR spectra of compound <b>4m</b> .....  | 27 |
| 50. <sup>13</sup> C NMR spectra of compound <b>4m</b> ..... | 28 |
| 51. EI-MS spectra of compound <b>4m</b> .....               | 28 |
| 52. FT-IR spectra of compound <b>4m</b> .....               | 29 |
| 53. <sup>1</sup> H NMR spectra of compound <b>4n</b> .....  | 29 |
| 54. <sup>13</sup> C NMR spectra of compound <b>4n</b> ..... | 30 |
| 55. EI-MS spectra of compound <b>4n</b> .....               | 30 |
| 56. FT-IR spectra of compound <b>4n</b> .....               | 31 |
| 57. <sup>1</sup> H NMR spectra of compound <b>4o</b> .....  | 31 |
| 58. <sup>13</sup> C NMR spectra of compound <b>4o</b> ..... | 32 |
| 59. EI-MS spectra of compound <b>4o</b> .....               | 32 |
| 60. FT-IR spectra of compound <b>4o</b> .....               | 33 |
| 61. <sup>1</sup> H NMR spectra of compound <b>4p</b> .....  | 33 |
| 62. <sup>13</sup> C NMR spectra of compound <b>4p</b> ..... | 34 |
| 63. EI-MS spectra of compound <b>4p</b> .....               | 34 |
| 64. FT-IR spectra of compound <b>4p</b> .....               | 35 |
| 65. <sup>1</sup> H NMR spectra of compound <b>4q</b> .....  | 35 |
| 66. <sup>13</sup> C NMR spectra of compound <b>4q</b> ..... | 36 |
| 67. EI-MS spectra of compound <b>4q</b> .....               | 36 |

|                                                                                          |    |
|------------------------------------------------------------------------------------------|----|
| 68. FT-IR spectra of compound <b>4q</b> .....                                            | 37 |
| 69. <sup>1</sup> H NMR spectra of compound <b>4r</b> .....                               | 37 |
| 70. <sup>13</sup> C NMR spectra of compound <b>4r</b> .....                              | 38 |
| 71. EI-MS spectra of compound <b>4r</b> .....                                            | 38 |
| 72. FT-IR spectra of compound <b>4r</b> .....                                            | 38 |
| 73. <sup>1</sup> H NMR spectra of compound <b>4s</b> .....                               | 39 |
| 74. <sup>13</sup> C NMR spectra of compound <b>4s</b> .....                              | 39 |
| 75. EI-MS spectra of compound <b>4s</b> .....                                            | 40 |
| 76. FT-IR spectra of compound <b>4s</b> .....                                            | 41 |
| 77. <sup>1</sup> H NMR spectra of compound <b>4t</b> .....                               | 41 |
| 78. <sup>13</sup> C NMR spectra of compound <b>4t</b> .....                              | 42 |
| 79. EI-MS spectra of compound <b>4t</b> .....                                            | 42 |
| 80. FT-IR spectra of compound <b>4t</b> .....                                            | 43 |
| 81. <sup>1</sup> H NMR spectra of compound <b>4u</b> .....                               | 43 |
| 82. <sup>13</sup> C NMR spectra of compound <b>4u</b> .....                              | 44 |
| 83. EI-MS spectra of compound <b>4u</b> .....                                            | 44 |
| 84. FT-IR spectra of compound <b>4u</b> .....                                            | 45 |
| 85. <sup>1</sup> H NMR spectra of compound <b>4v</b> .....                               | 45 |
| 86. <sup>13</sup> C NMR spectra of compound <b>4v</b> .....                              | 45 |
| 87. EI-MS spectra of compound <b>4v</b> .....                                            | 46 |
| 88. FT-IR spectra of compound <b>4v</b> .....                                            | 47 |
| 89. <sup>1</sup> H NMR spectra of compound <b>4w</b> .....                               | 47 |
| 90. <sup>13</sup> C NMR spectra of compound <b>4w</b> .....                              | 48 |
| 91. EI-MS spectra of compound <b>4w</b> .....                                            | 48 |
| 92. FT-IR spectra of compound <b>4w</b> .....                                            | 49 |
| 93. Selected geometric parameters of compound <b>4n</b> .....                            | 49 |
| 94. Hydrogen bonding data for compound <b>4n</b> (Å, °).....                             | 50 |
| 95. Selected distances between hydrogen and carbon atoms for compound <b>4n</b> (Å)..... | 50 |

# <sup>1</sup>H NMR spectra of compound 4a

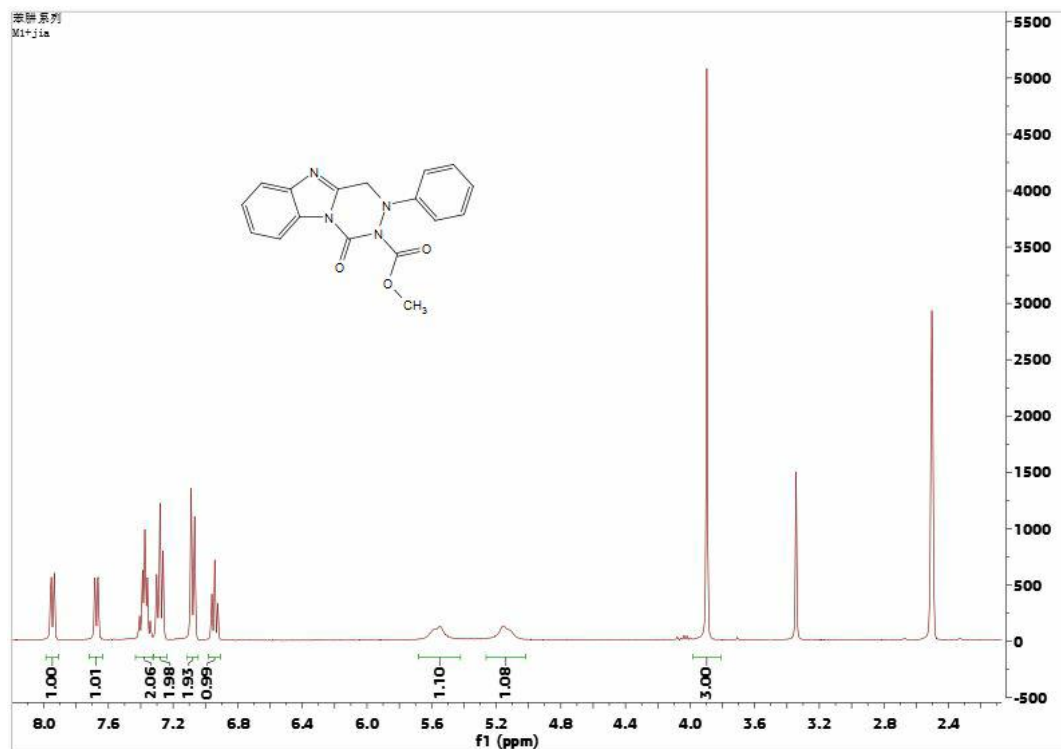

## 1. <sup>13</sup>C NMR spectra of compound 4a

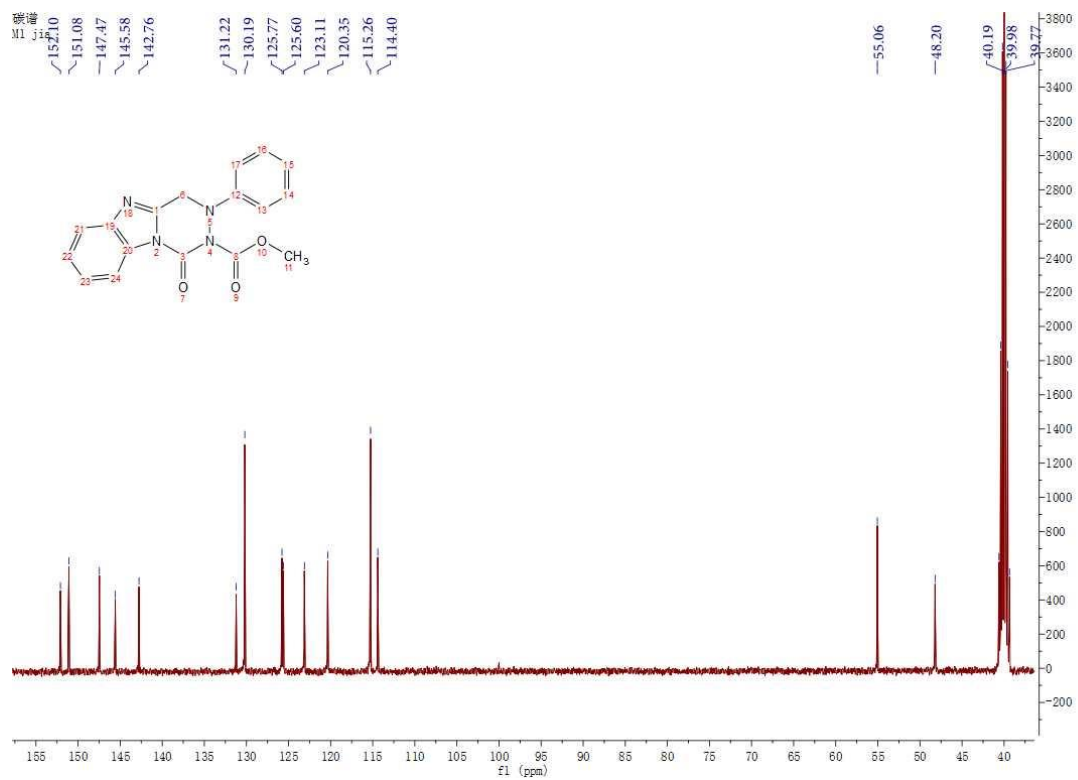

## 2. EI-MS spectra of compound 4a

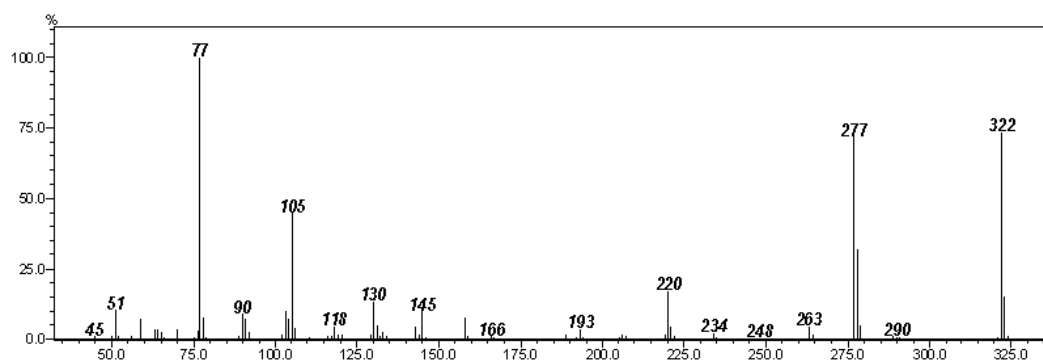

## 3. FT-IR spectra of compound 4a

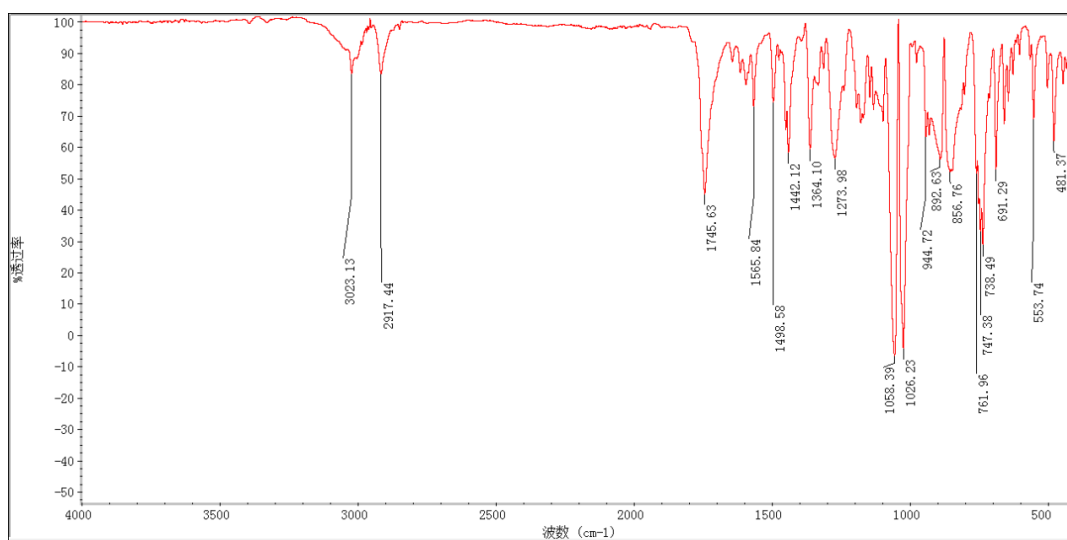

#### 4. $^1\text{H}$ NMR spectra of compound **4b**

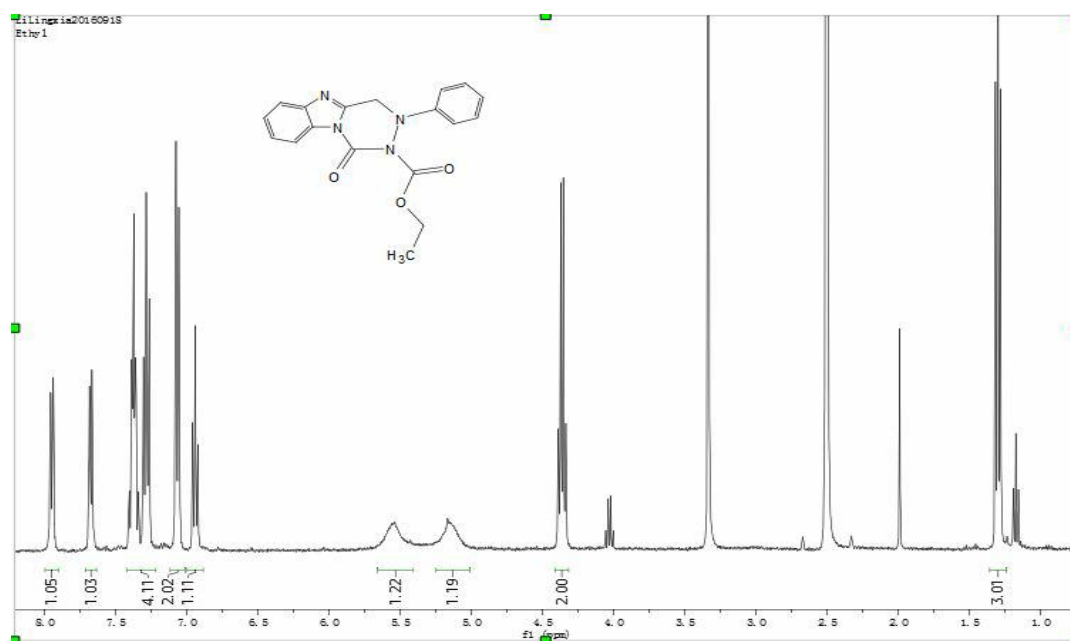

#### 5. $^{13}\text{C}$ NMR spectra of compound **4b**

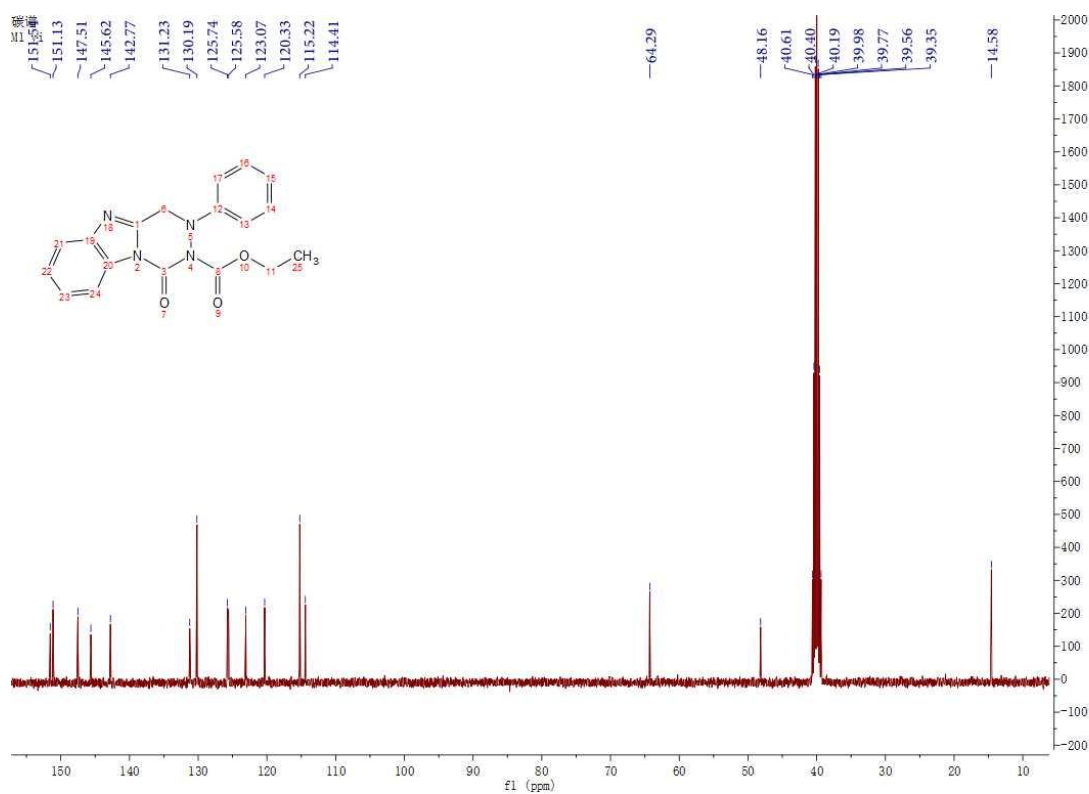

## 6. EI-MS spectra of compound 4b

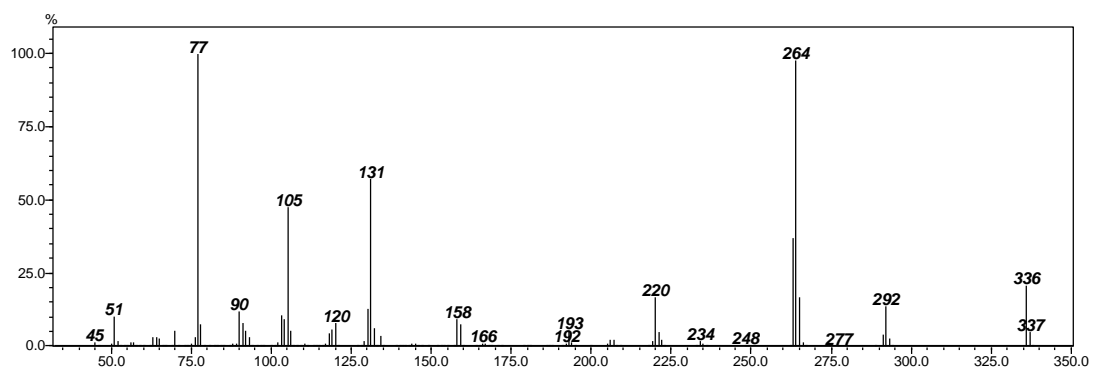

## 7. FT-IR spectra of compound 4b

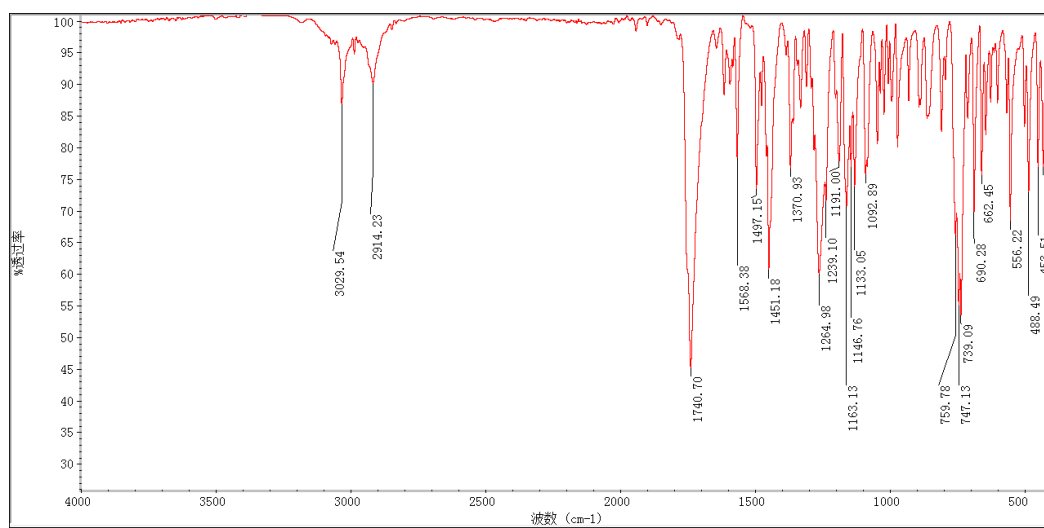

8. <sup>1</sup>H NMR spectra of compound 4c

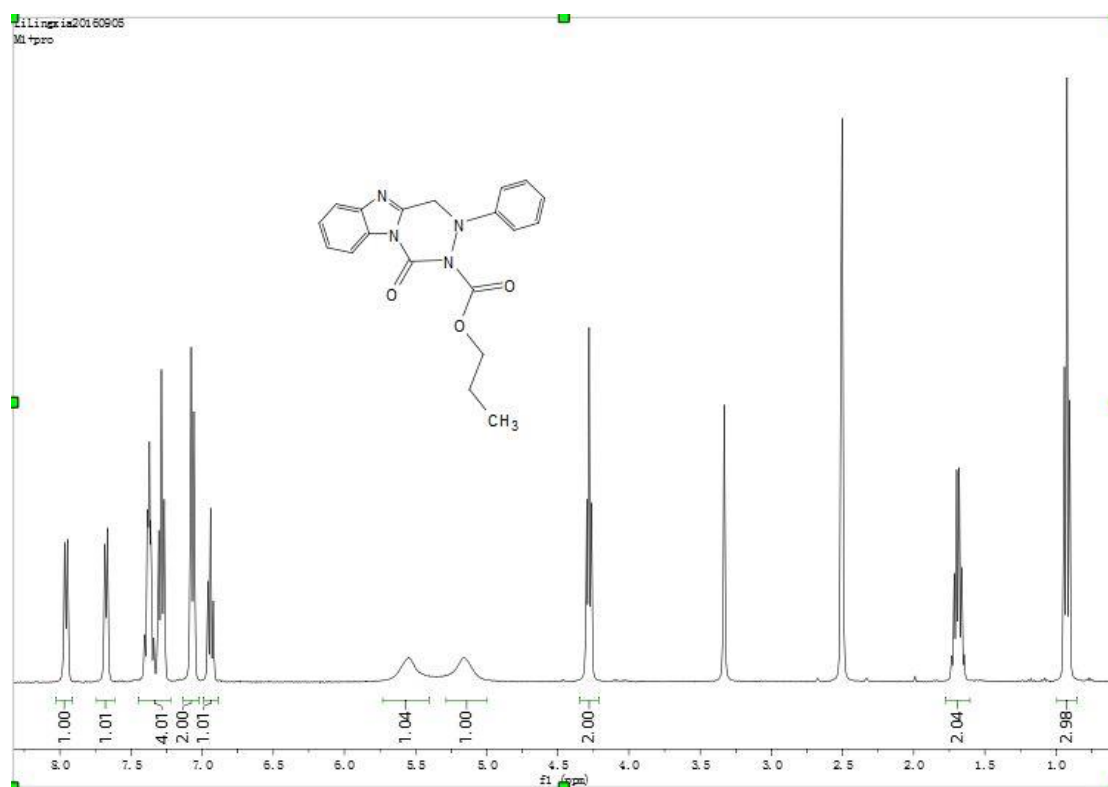

9. <sup>13</sup>C NMR spectra of compound 4c

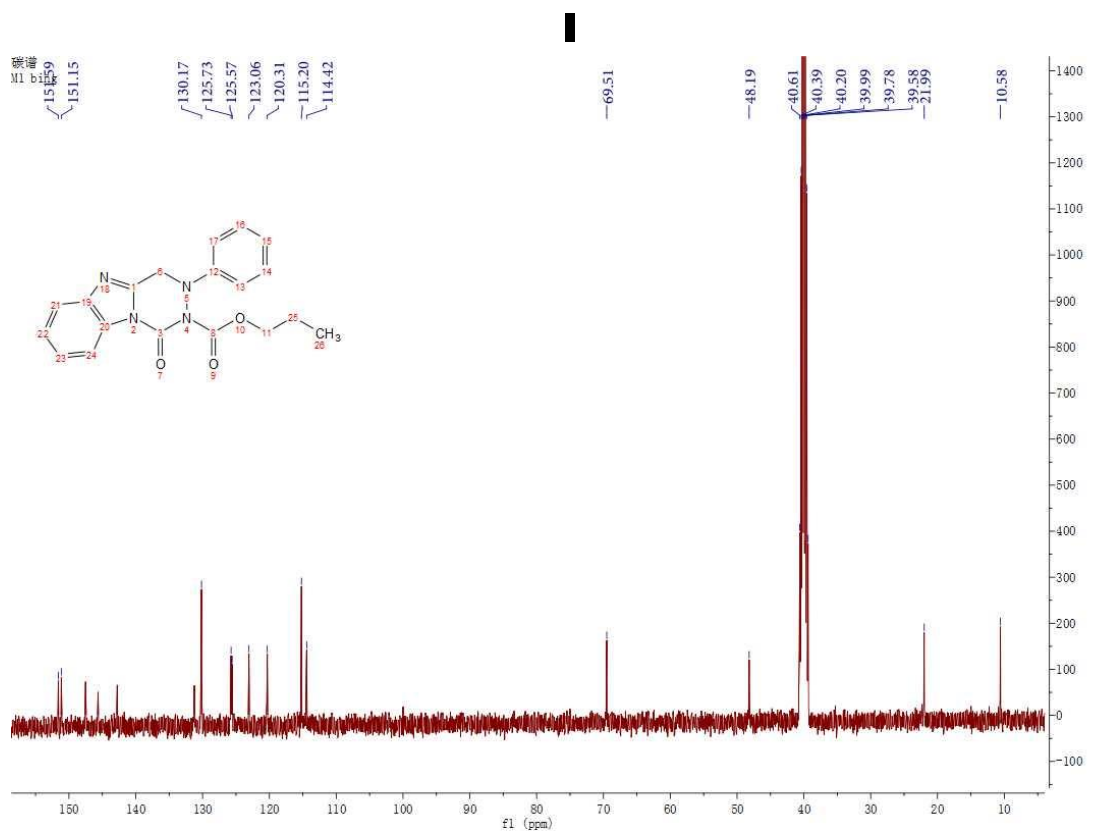



### 10. EI-MS spectra of compound 4c

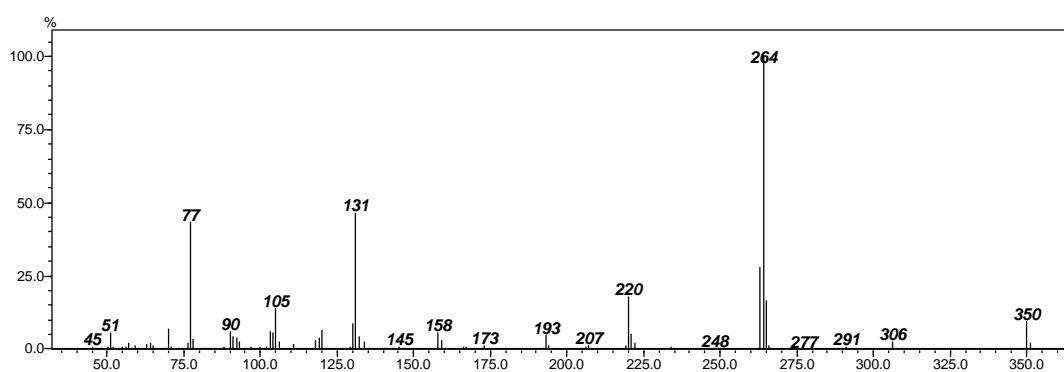

### 11. FT-IR spectra of compound 4c

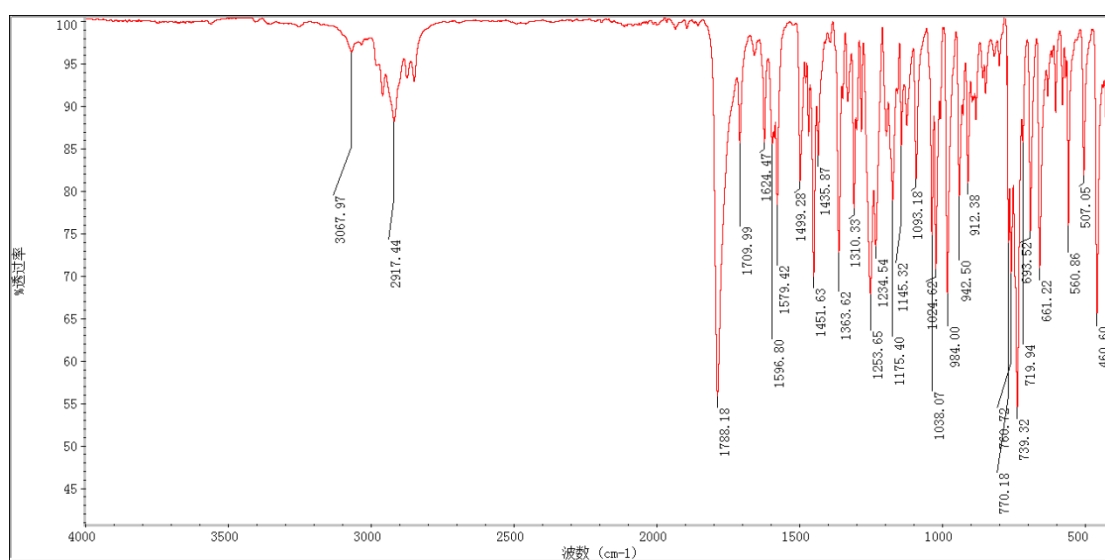

### 12. <sup>1</sup>H NMR spectra of compound 4d

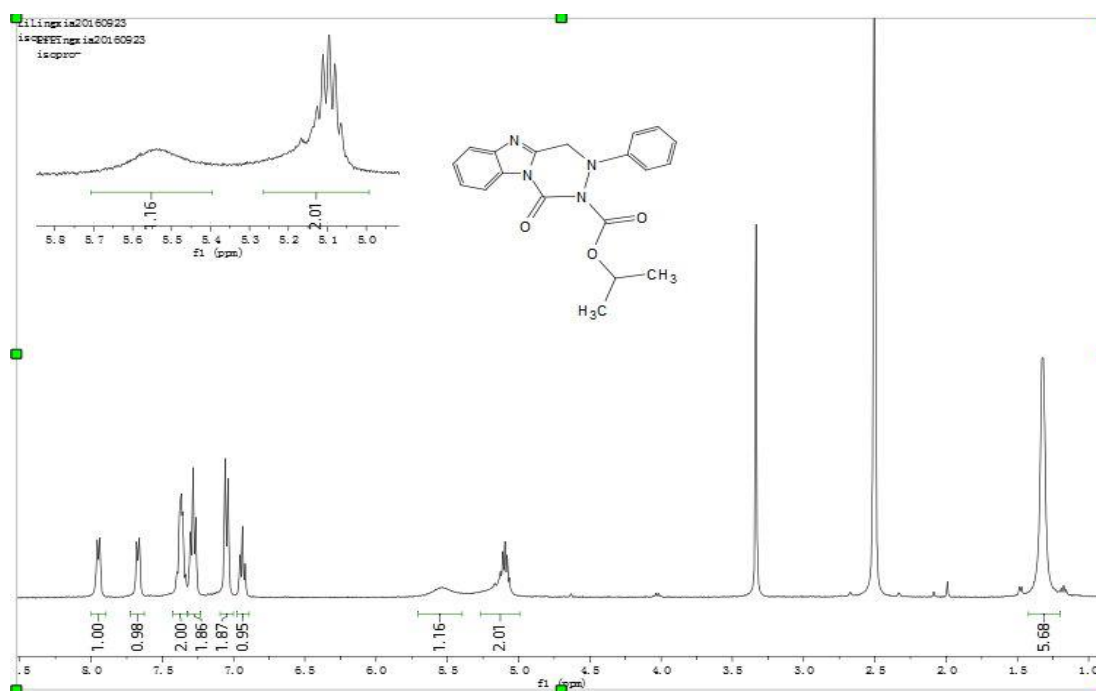

13. <sup>13</sup>C NMR spectra of compound 4d

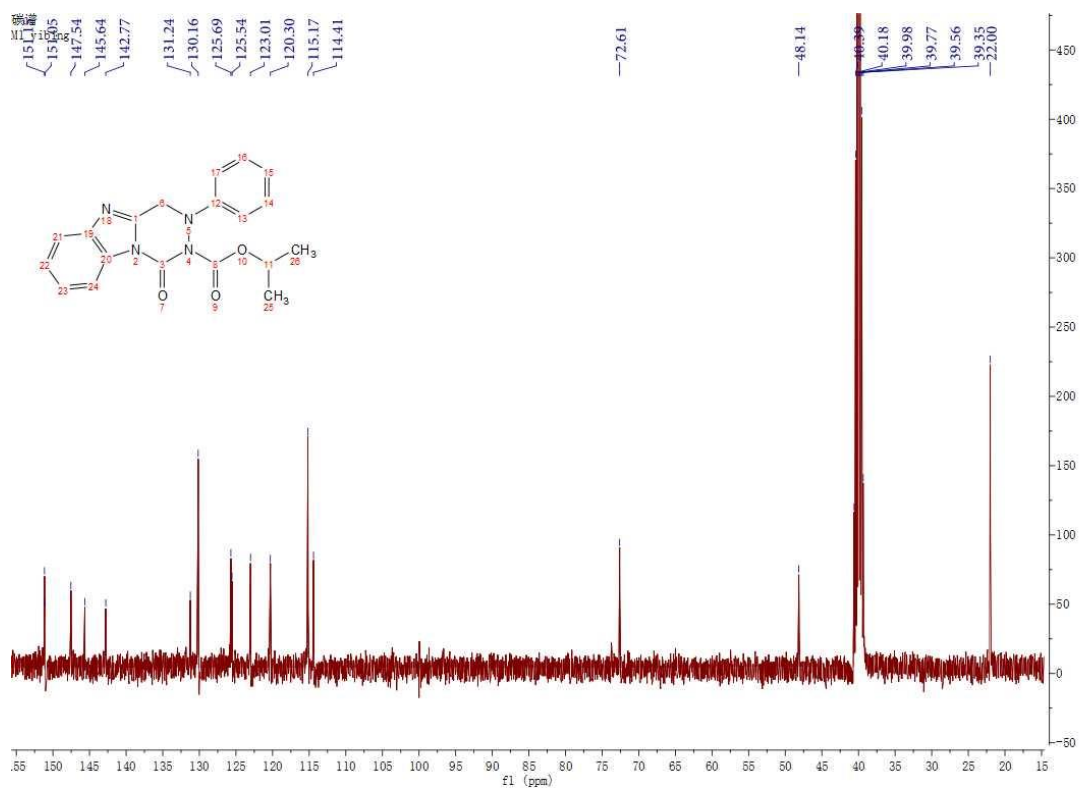

14. EI-MS spectra of compound 4d

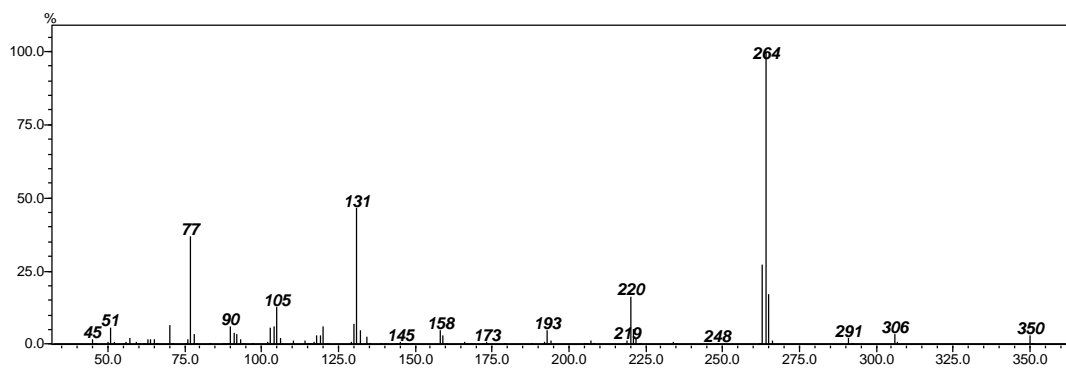

### 15. FT-IR spectra of compound 4d

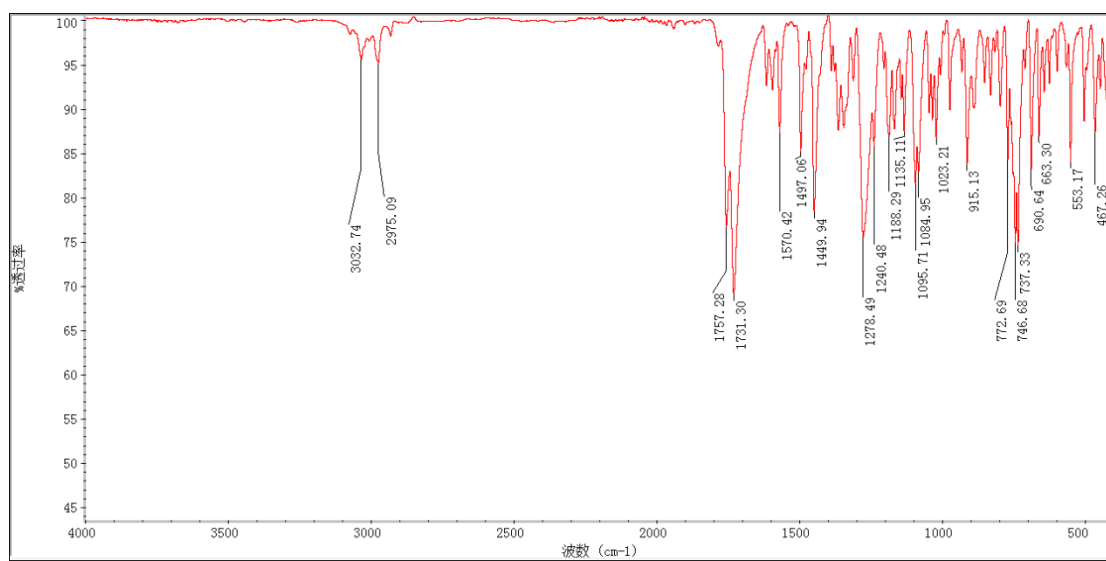

### 16. <sup>1</sup>H NMR spectra of compound 4e

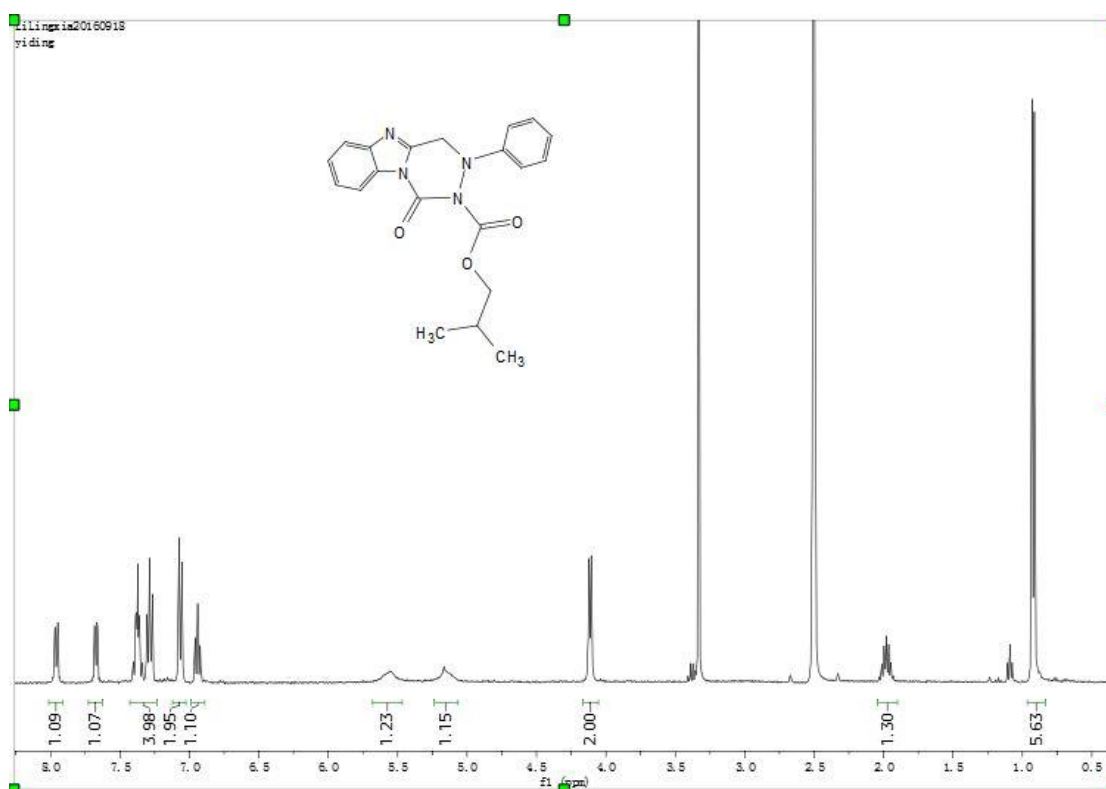

17. <sup>13</sup>C NMR spectra of compound 4e

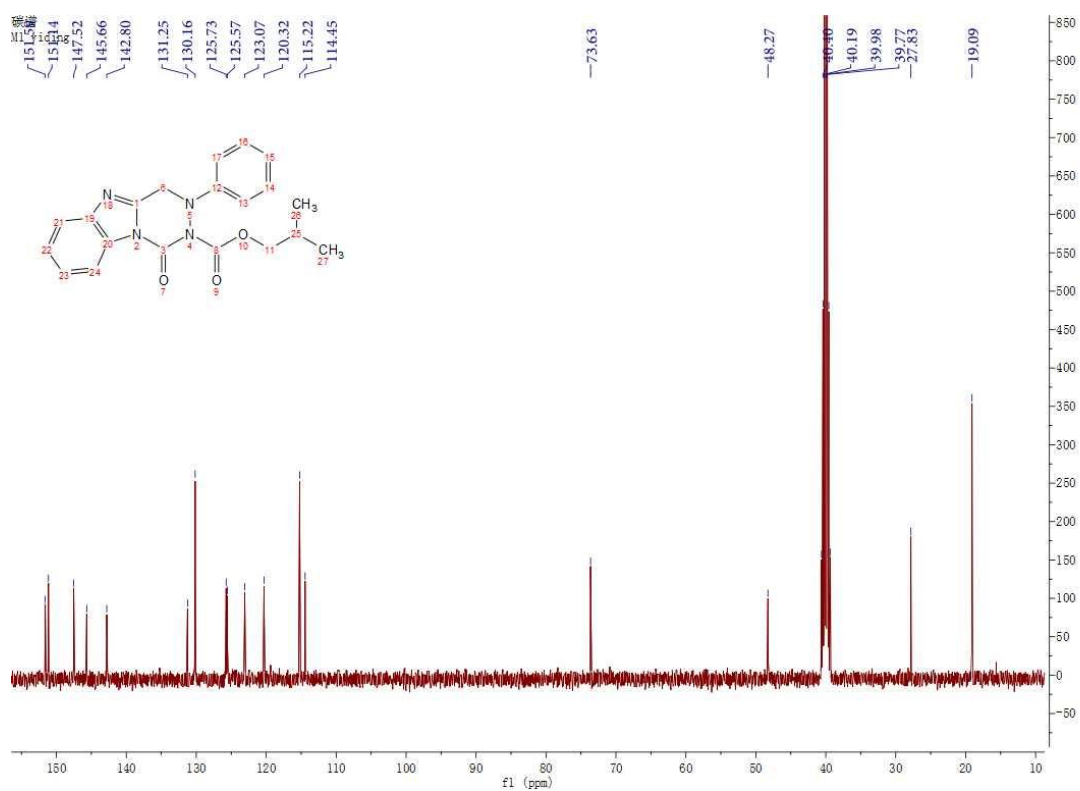

18. EI-MS spectra of compound 4e

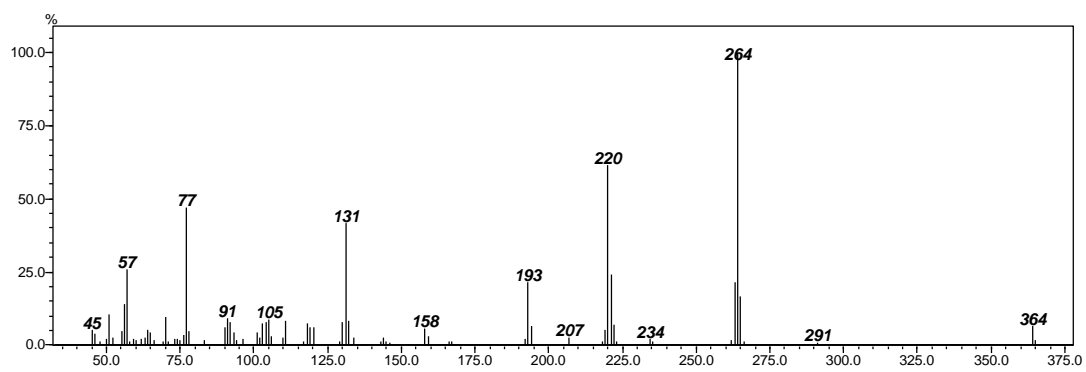

### 19. FT-IR spectra of compound 4e

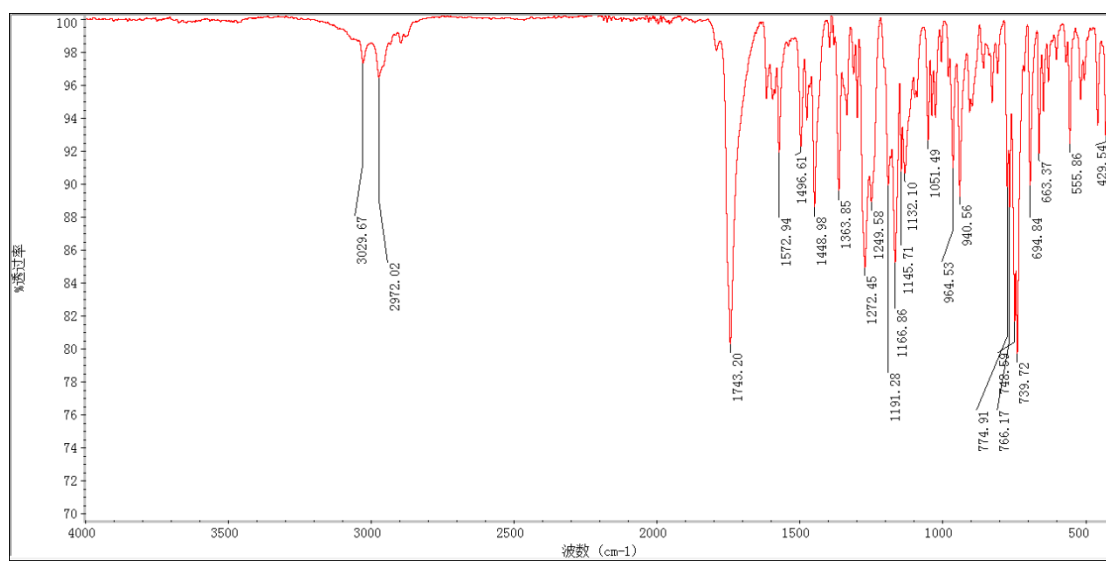

### 20. <sup>1</sup>H NMR spectra of compound 4f

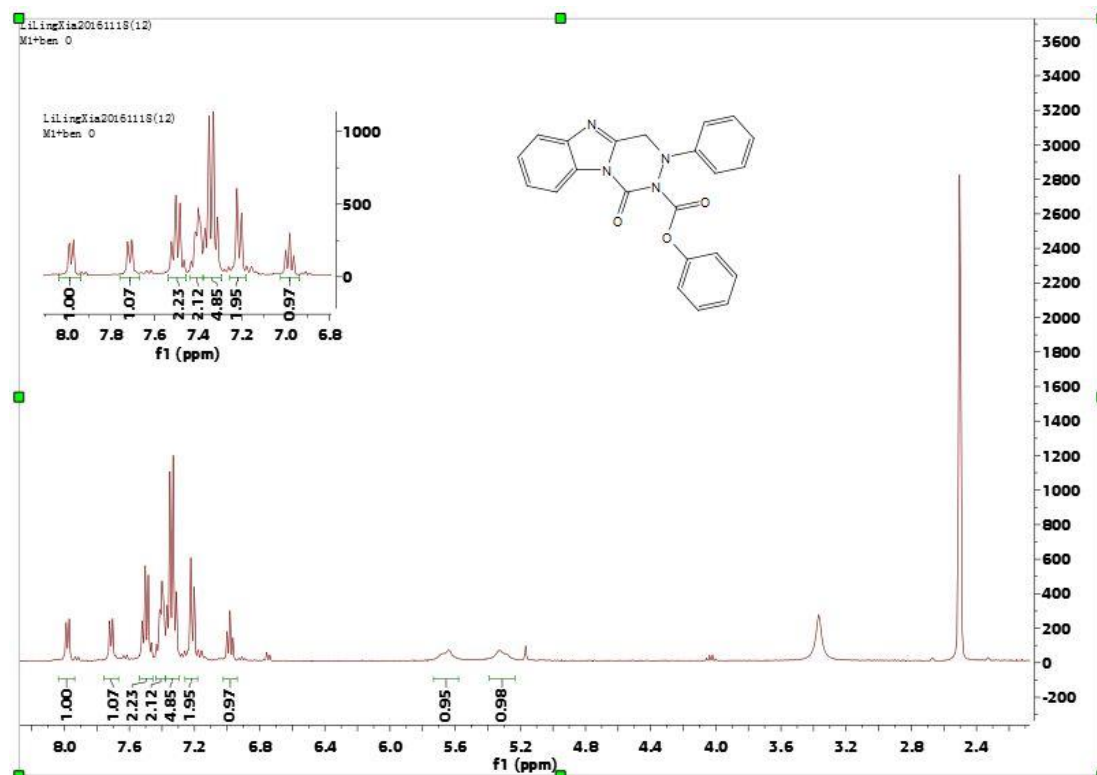

## 21. <sup>13</sup>C NMR spectra of compound 4f

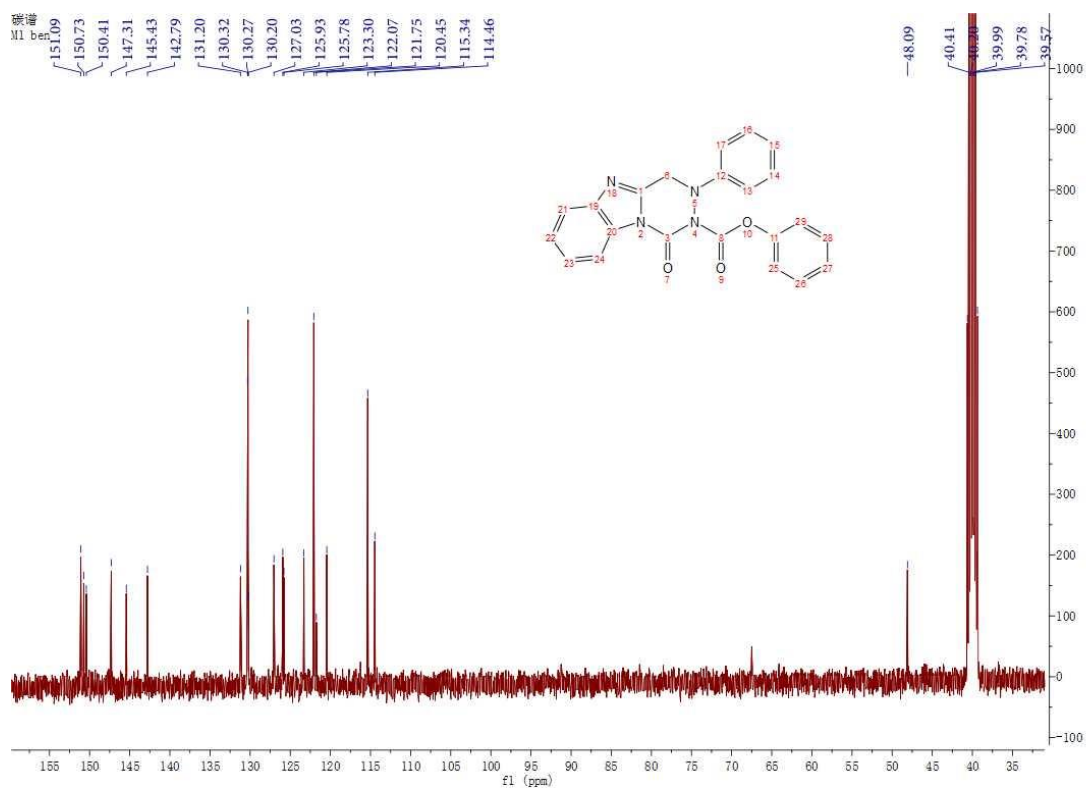

## 22. EI-MS spectra of compound 4f

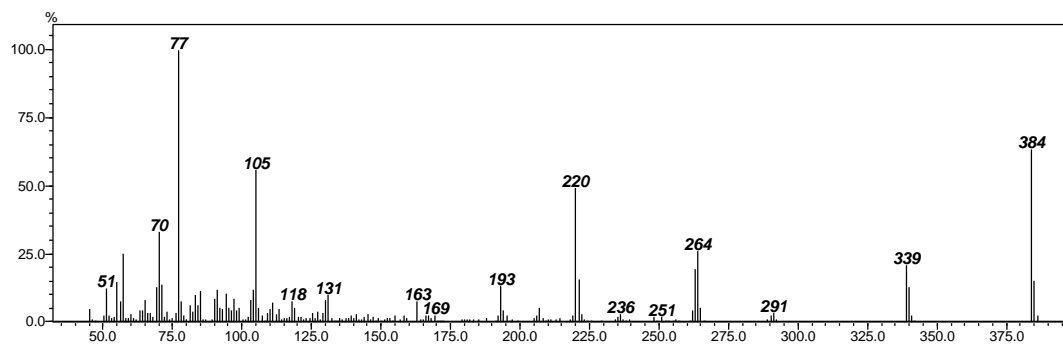

### 23. FT-IR spectra of compound 4f

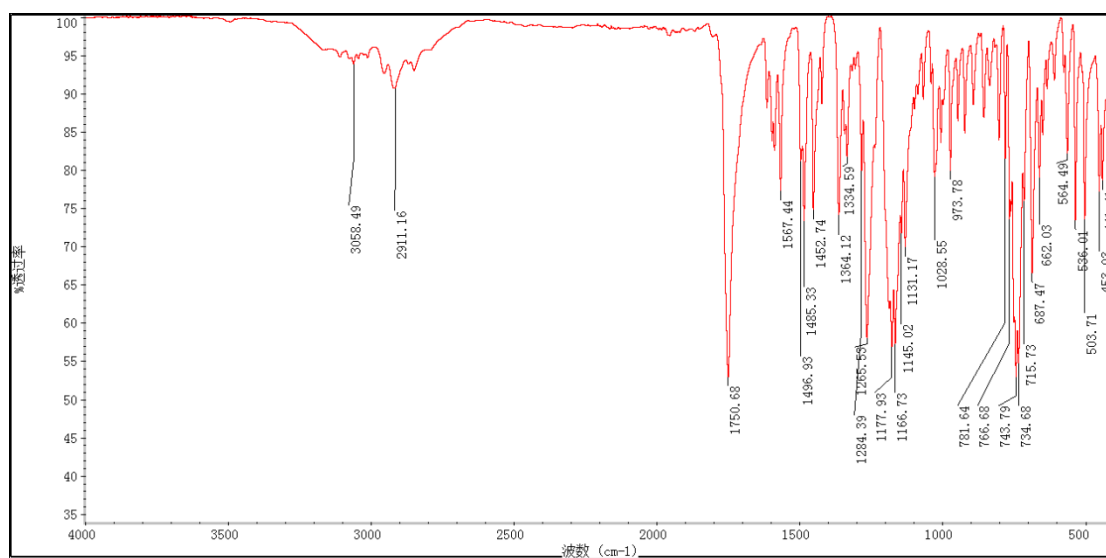

### 24. <sup>1</sup>H NMR spectra of compound 4g

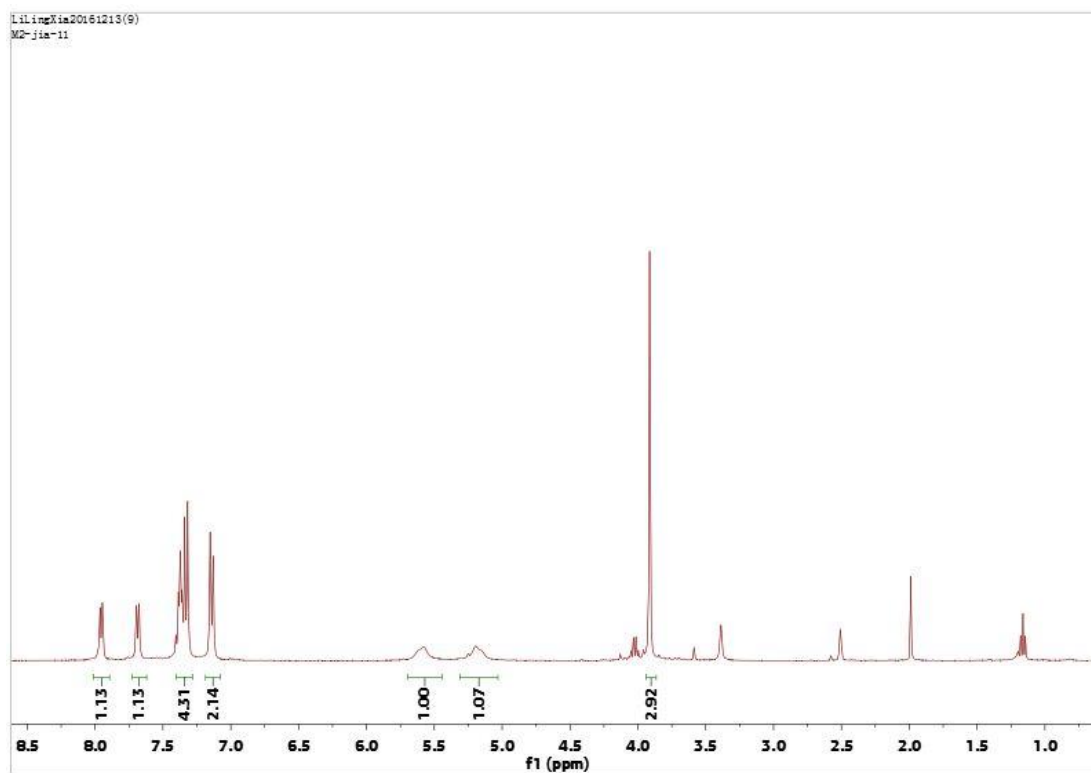

25.  $^{13}\text{C}$  NMR spectra of compound **4g**

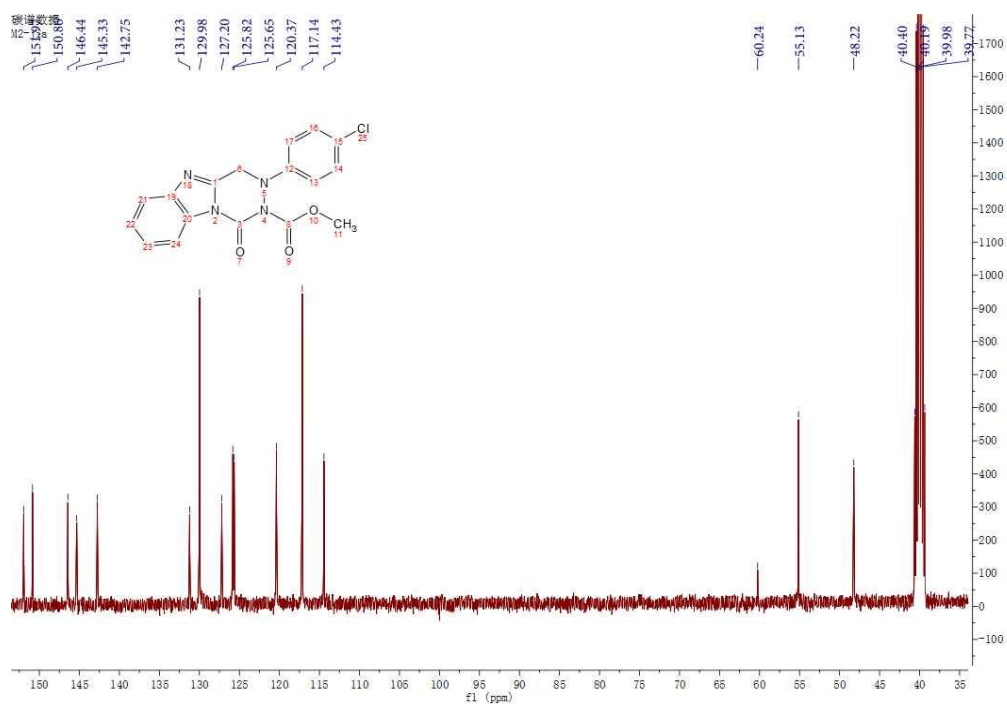

26. EI-MS spectra of compound **4g**

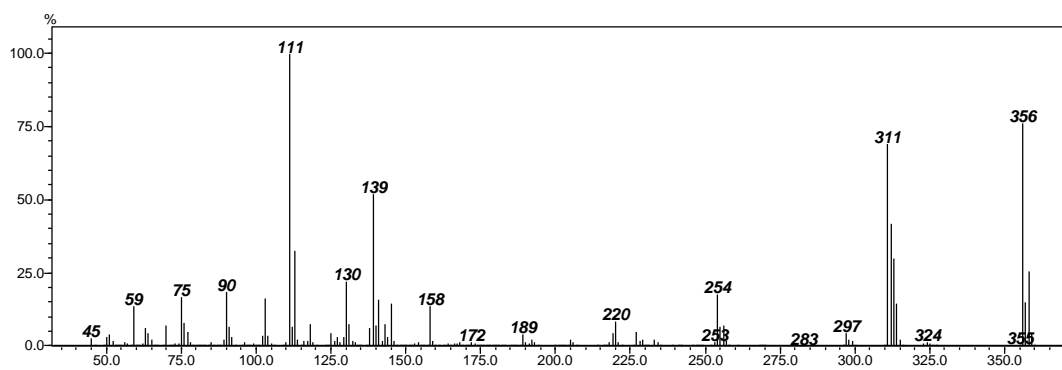



## 27. FT-IR spectra of compound 4g

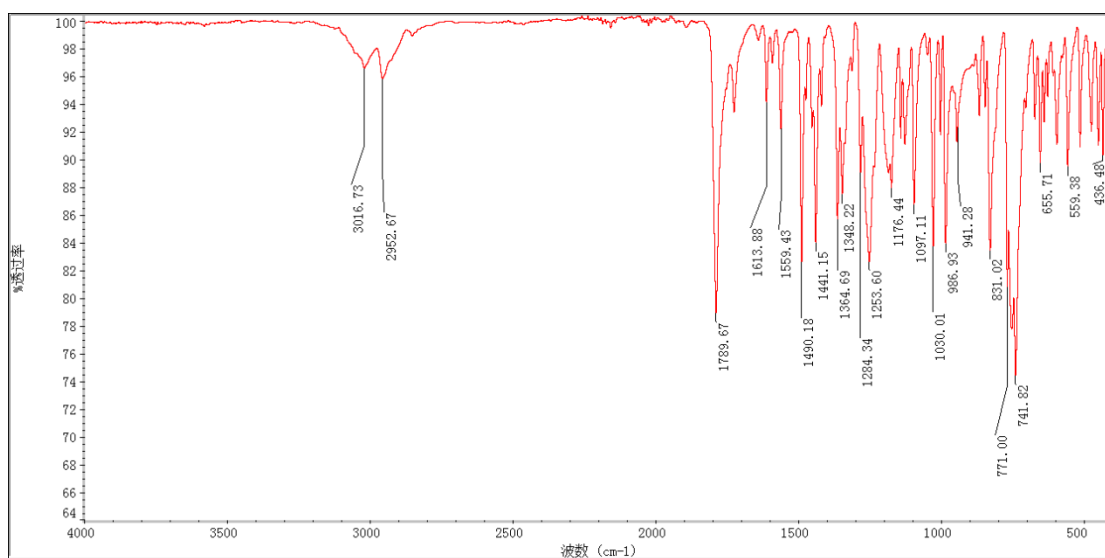

## 28. <sup>1</sup>H NMR spectra of compound 4h

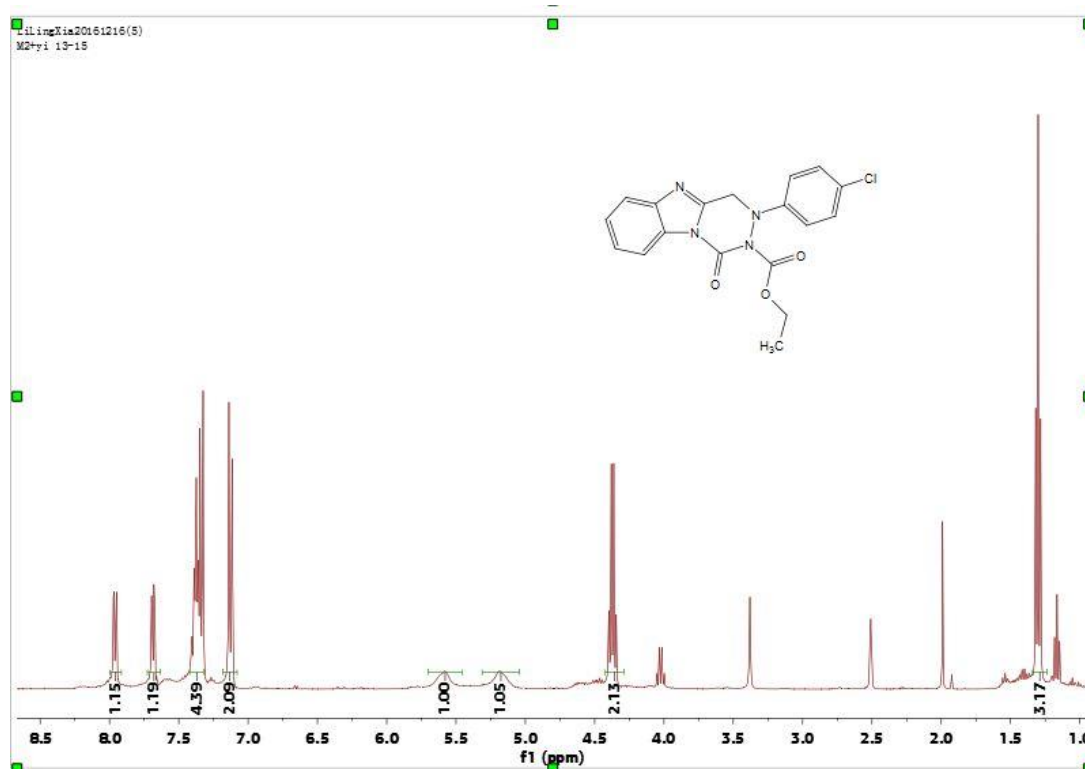

29. <sup>13</sup>C NMR spectra of compound 4h

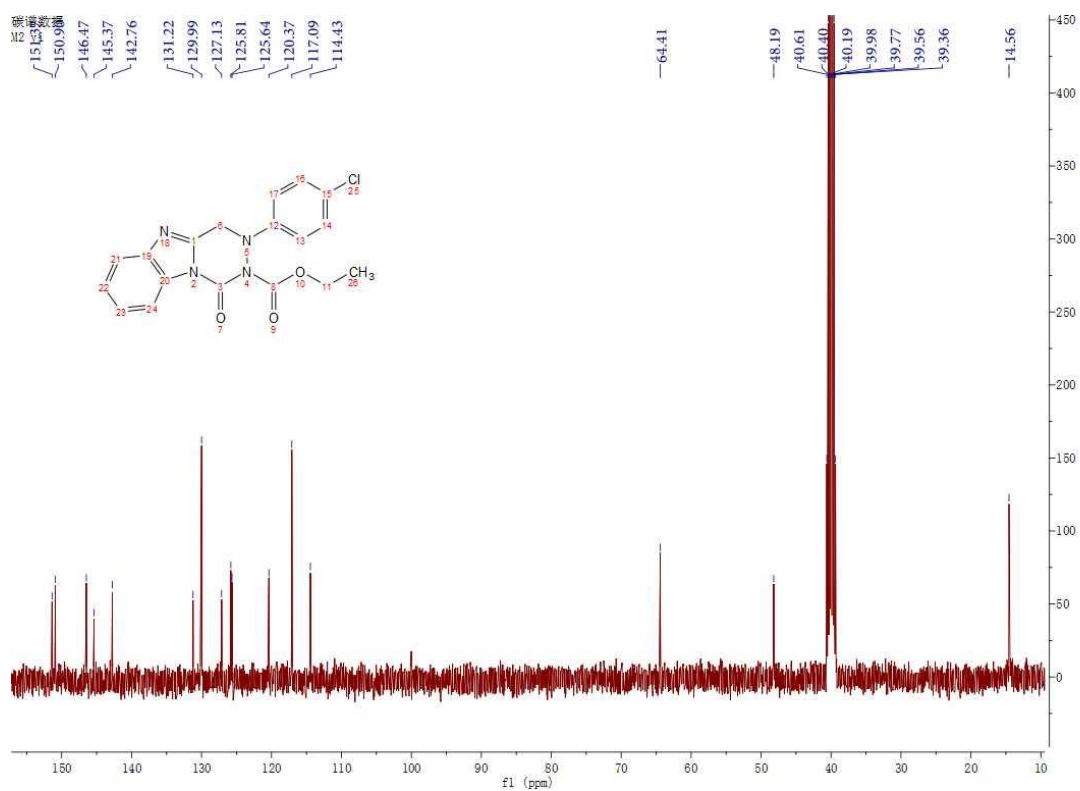

30. EI-MS spectra of compound 4h

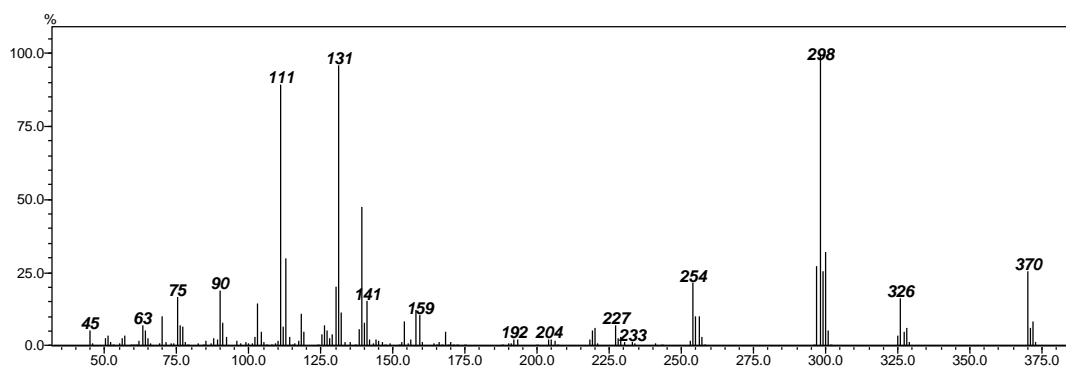

### 31. FT-IR spectra of compound 4h

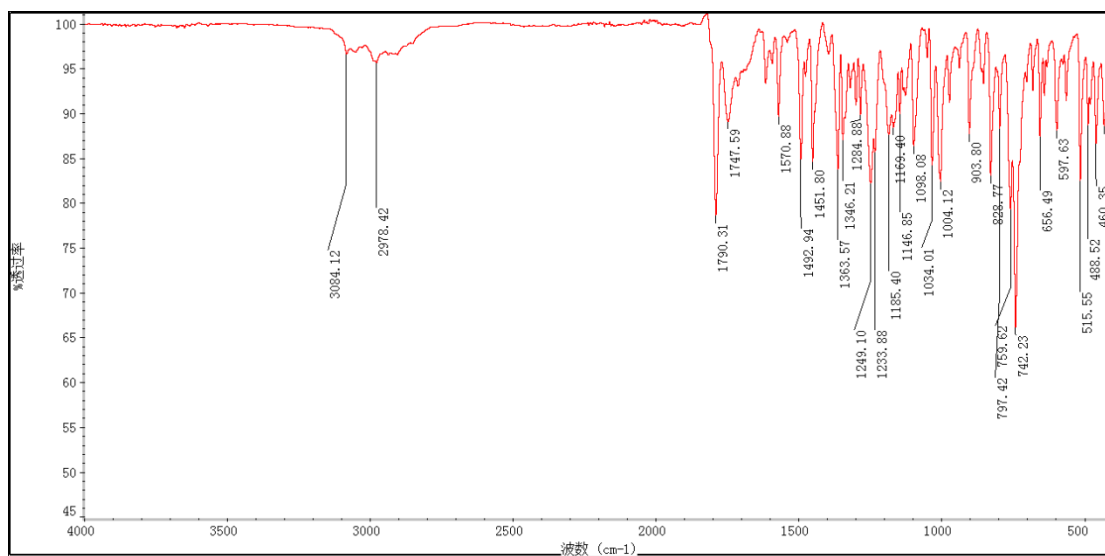

### 32. <sup>1</sup>H NMR spectra of compound 4i

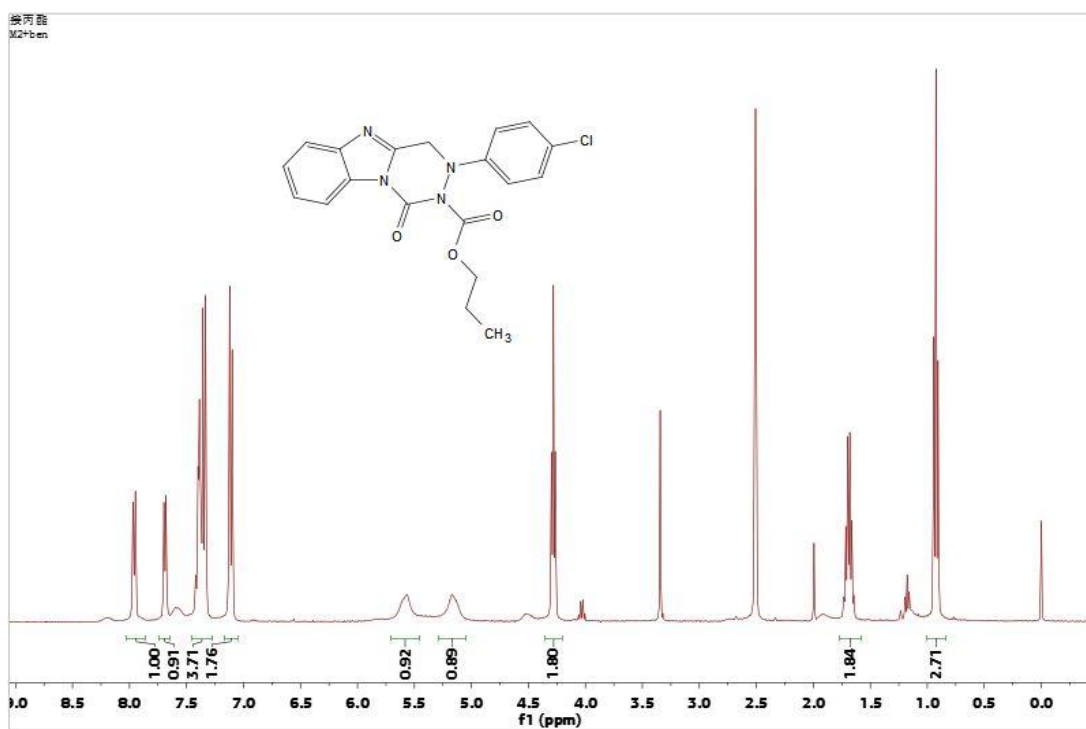

### 33. <sup>13</sup>C NMR spectra of compound **4i**

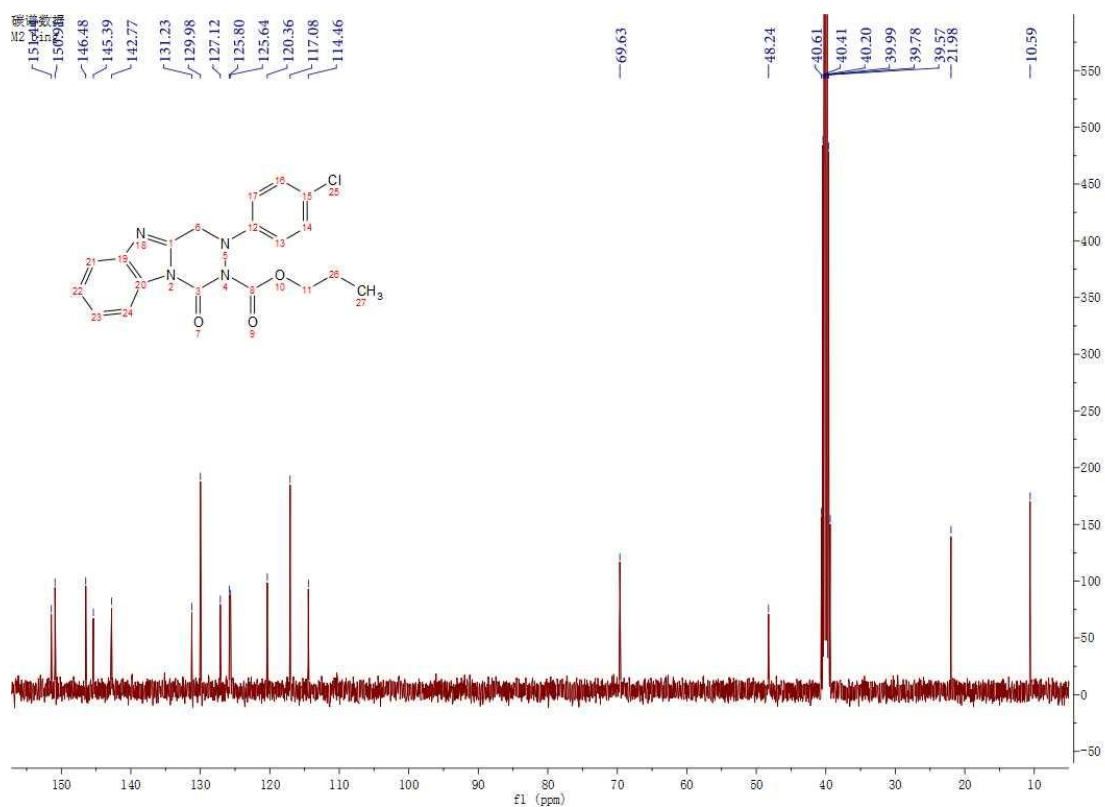

### 34. EI-MS spectra of compound **4i**

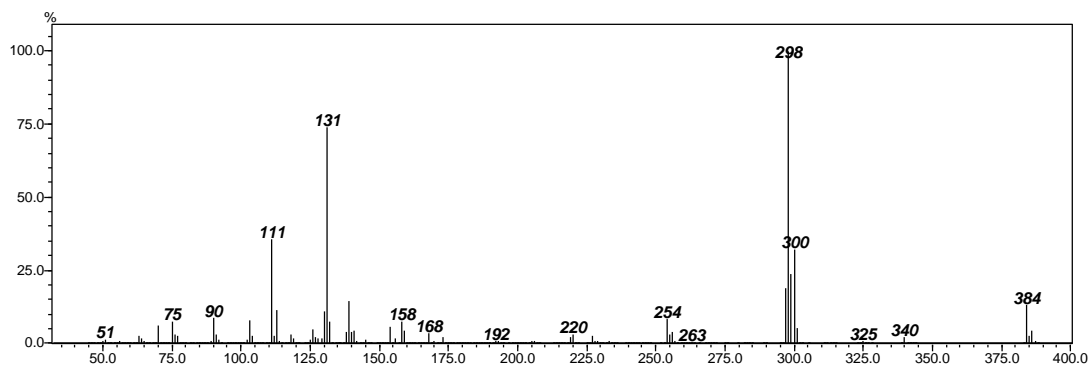

35. FT-IR spectra of compound 4i

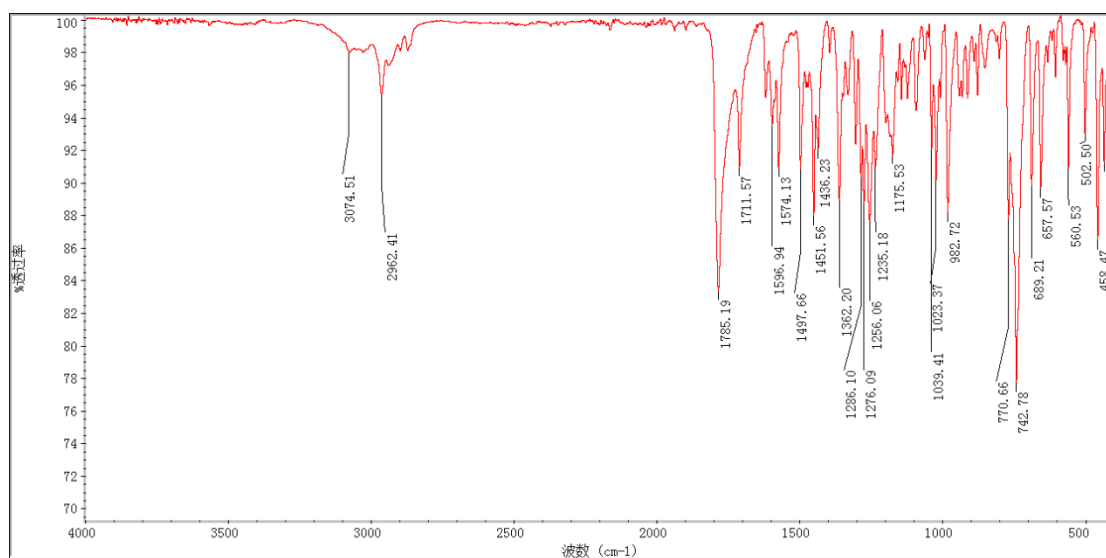

36. <sup>1</sup>H NMR spectra of compound 4j

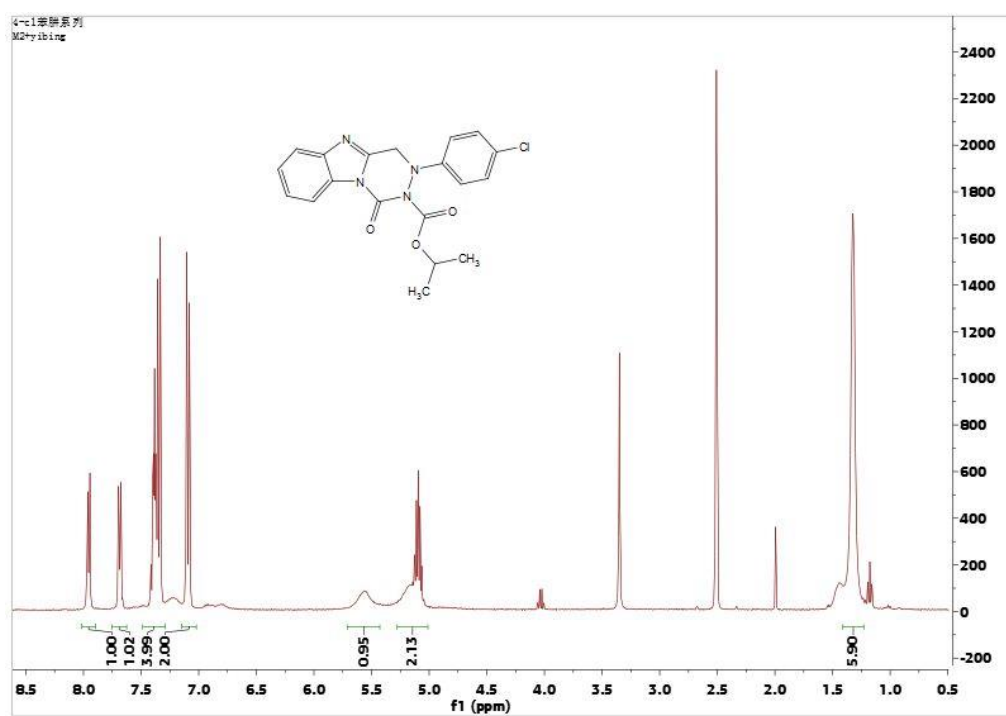

37. <sup>13</sup>C NMR spectra of compound 4j

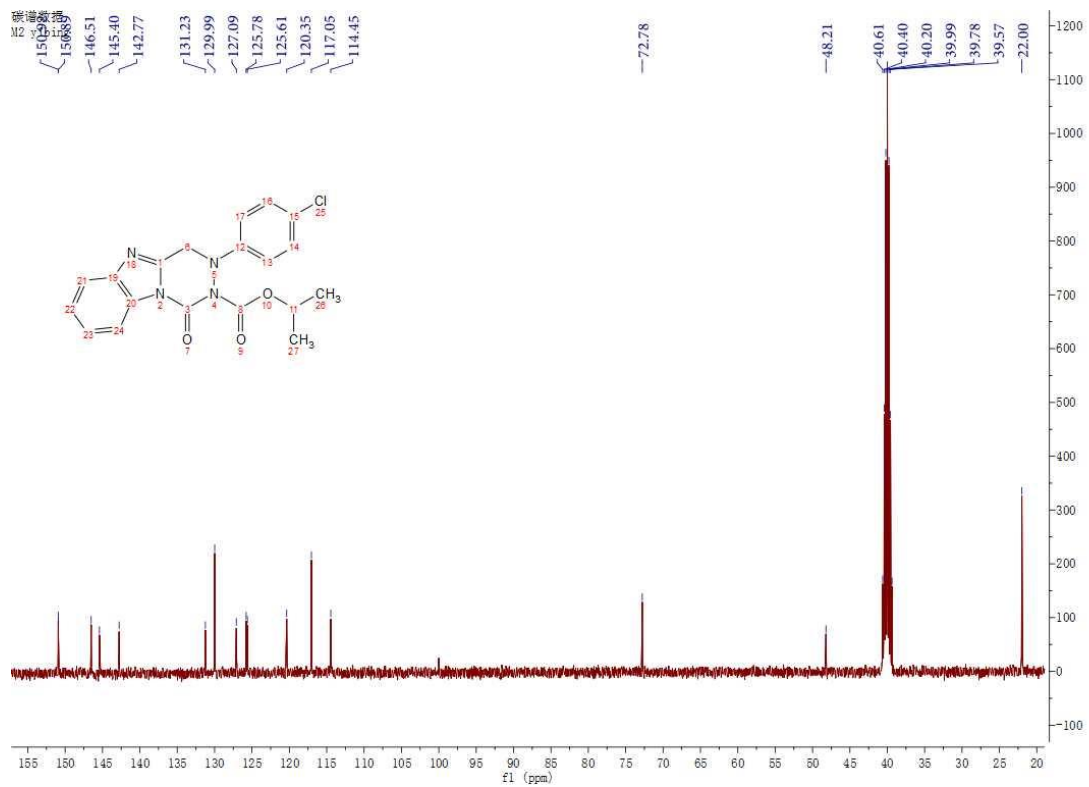

38. EI-MS spectra of compound 4j

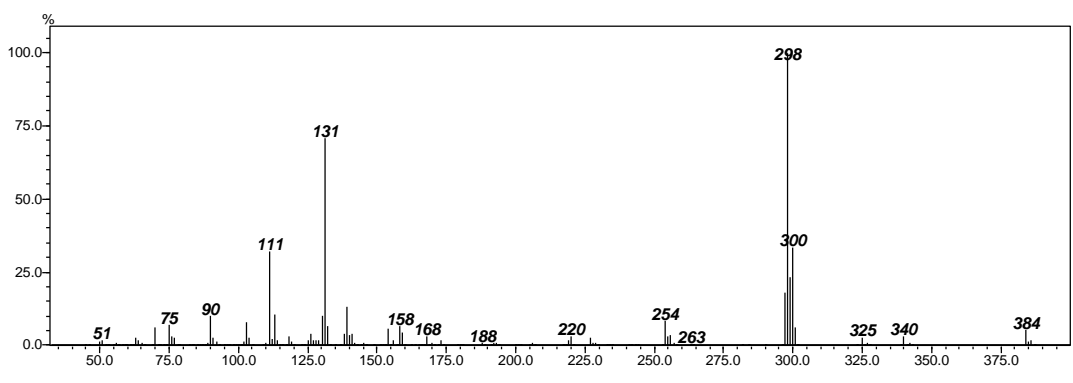

39. FT-IR spectra of compound 4j

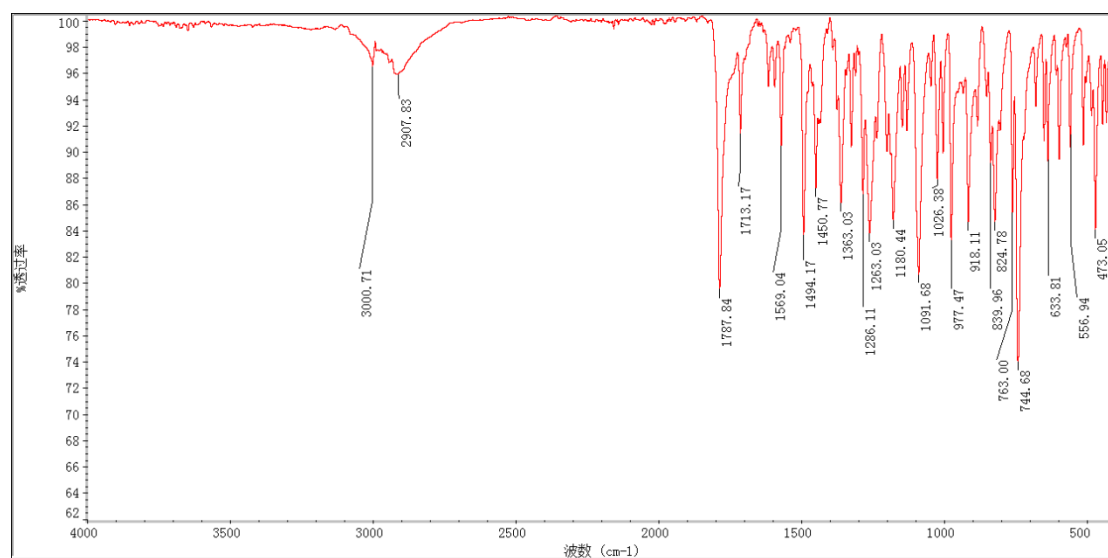

40. <sup>1</sup>H NMR spectra of compound 4k

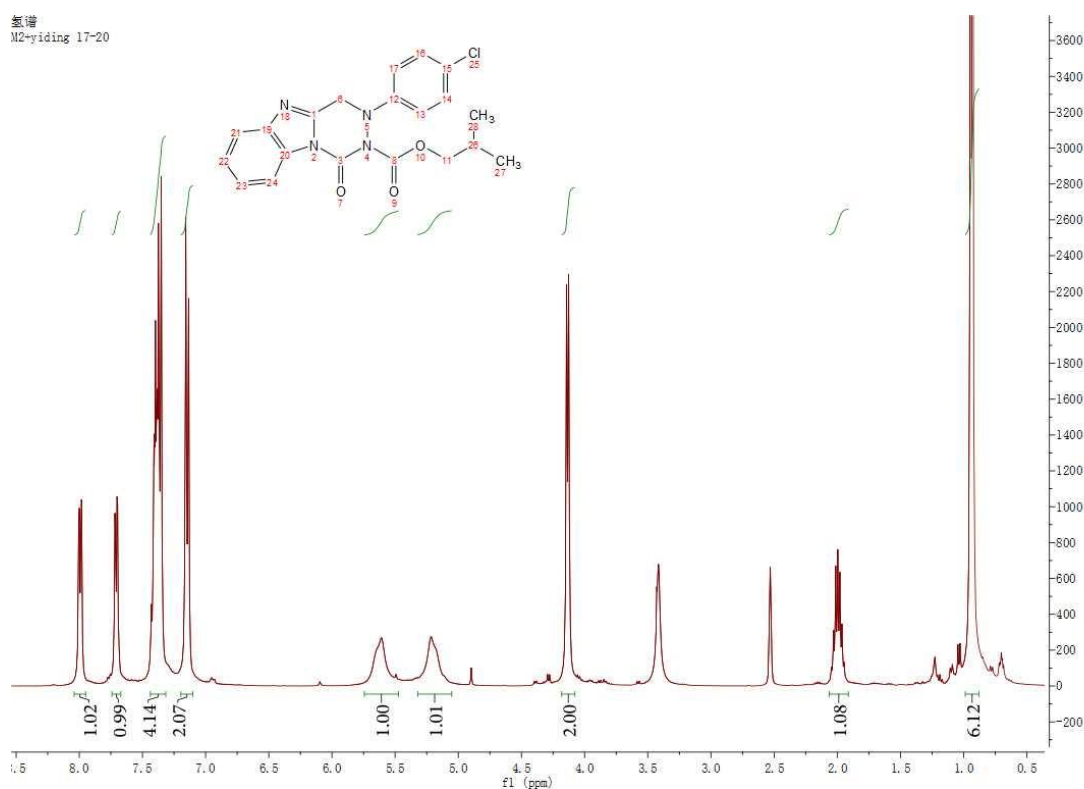

#### 41. <sup>13</sup>C NMR spectra of compound 4k

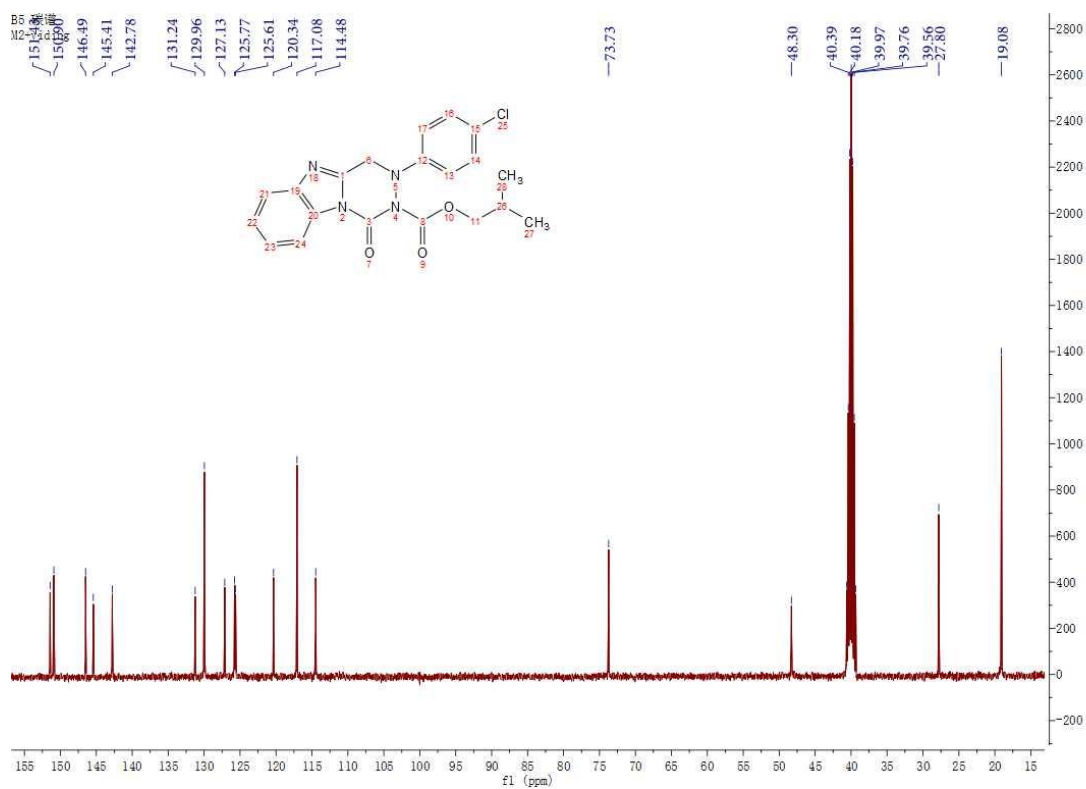

#### 42. EI-MS spectra of compound 4k

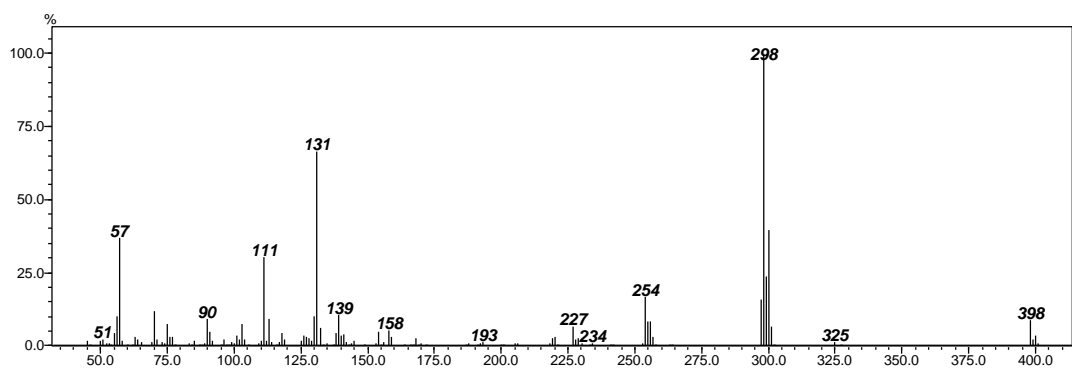



43. FT-IR spectra of compound 4k

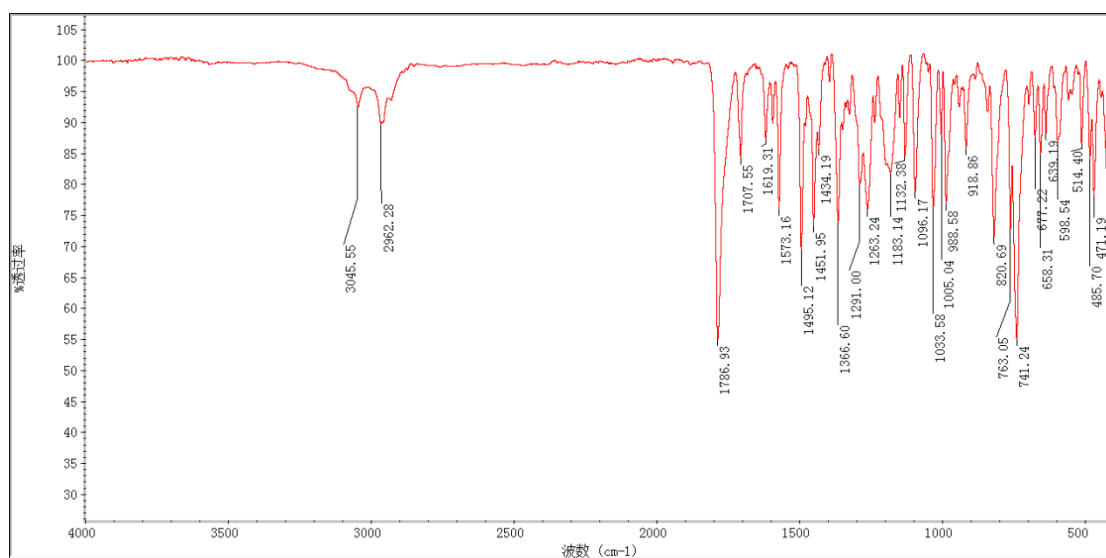

44. <sup>1</sup>H NMR spectra of compound 4l

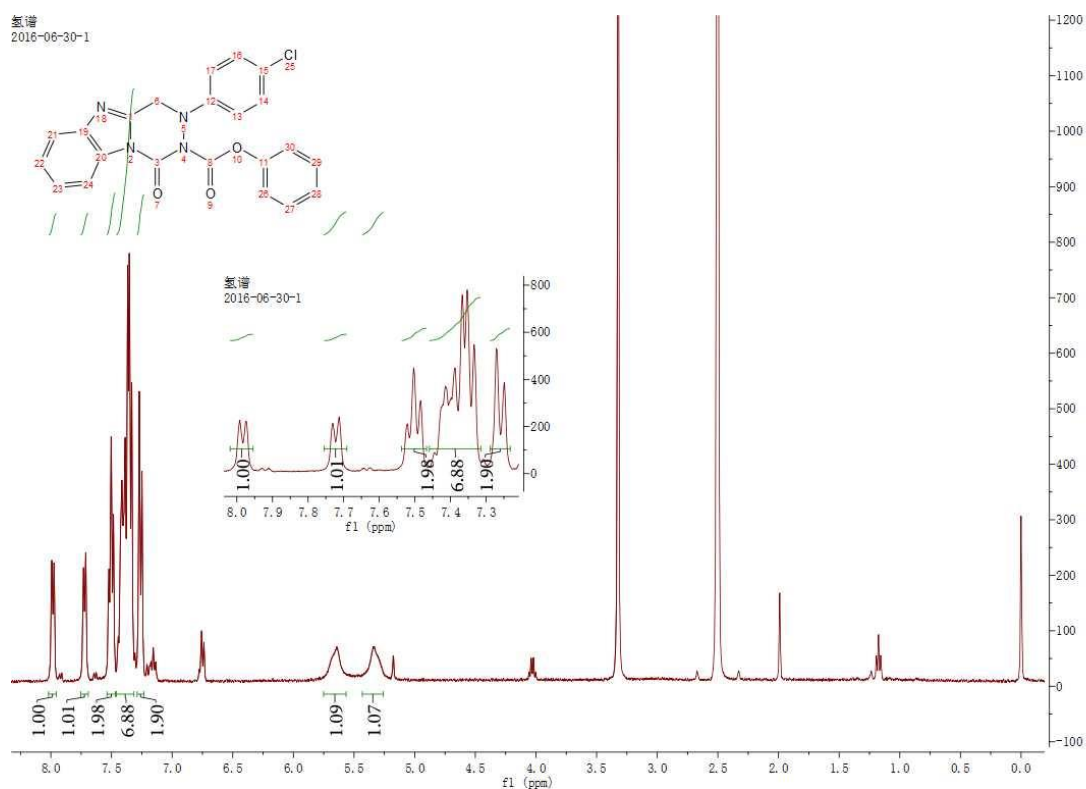

#### 45. $^{13}\text{C}$ NMR spectra of compound 41

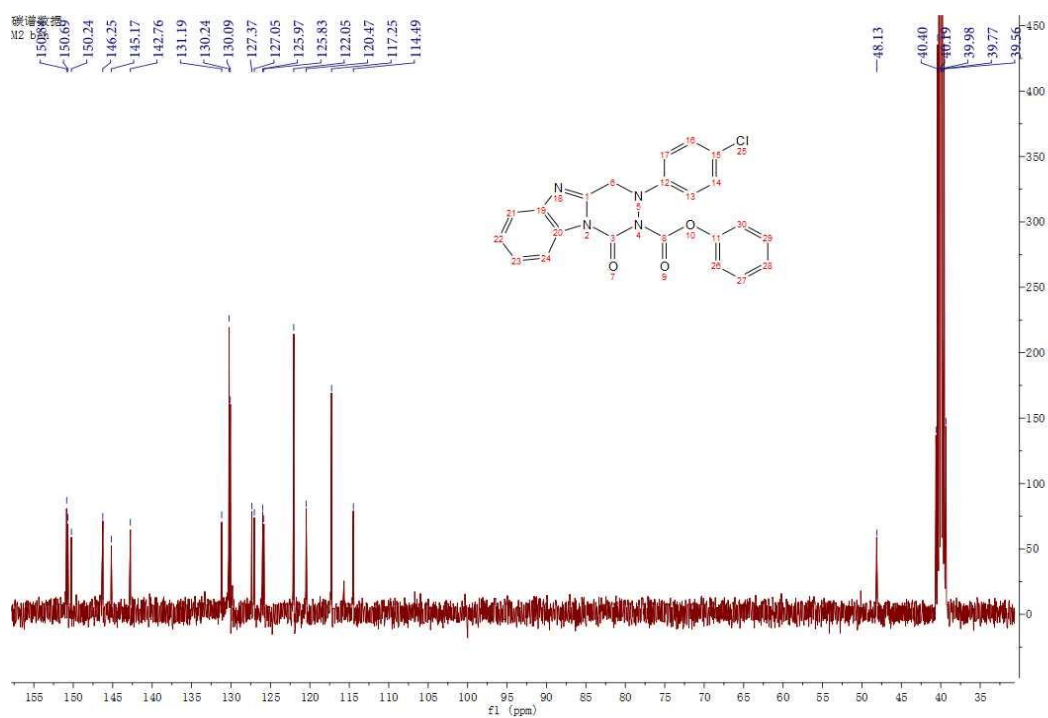

#### 46. EI-MS spectra of compound 41

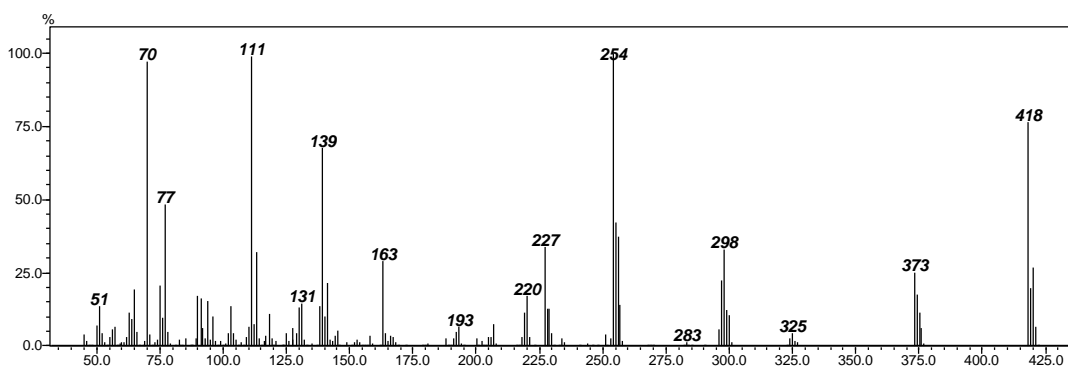

47. FT-IR spectra of compound 4l

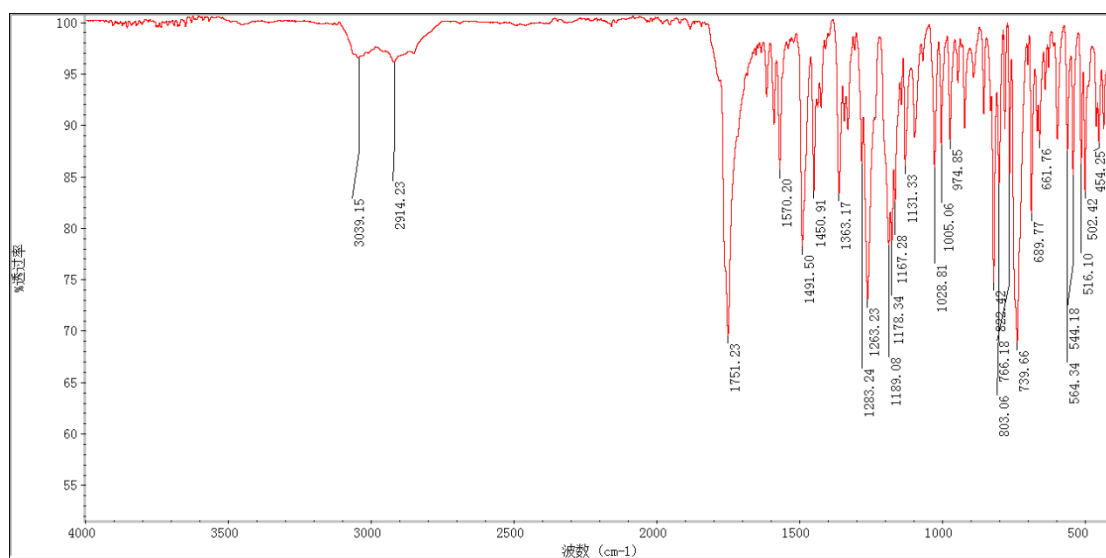

48. <sup>1</sup>H NMR spectra of compound 4m

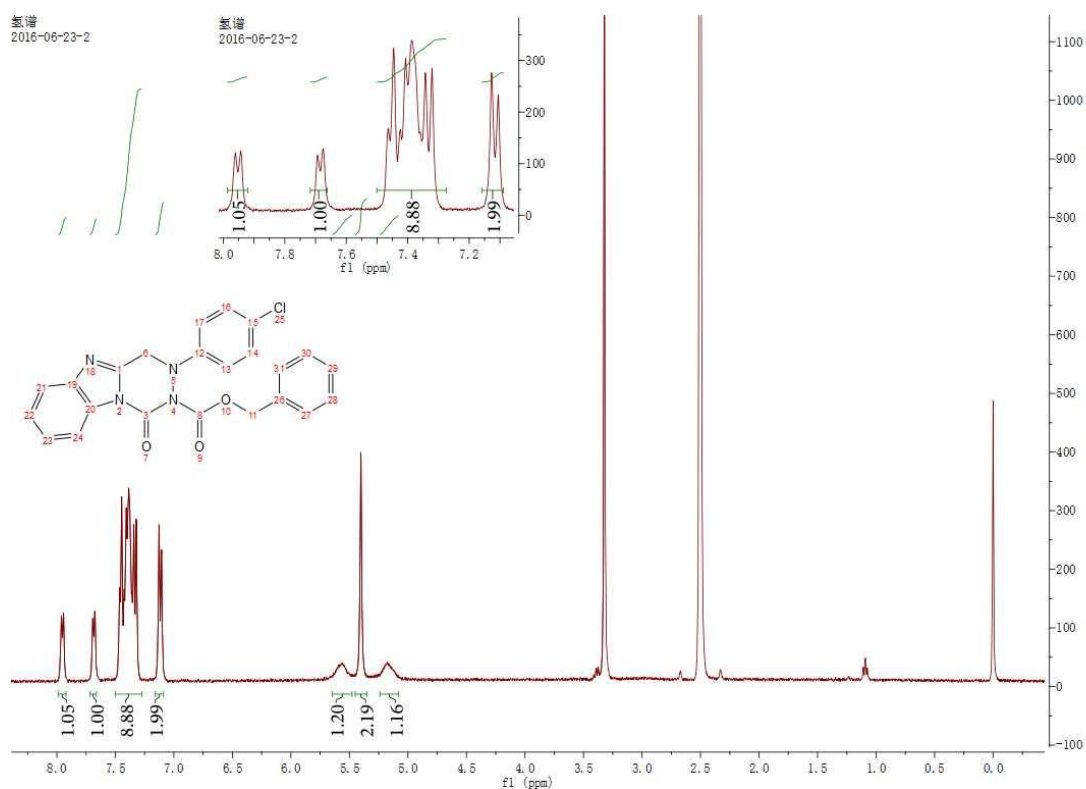

49.  $^{13}\text{C}$  NMR spectra of compound **4m**

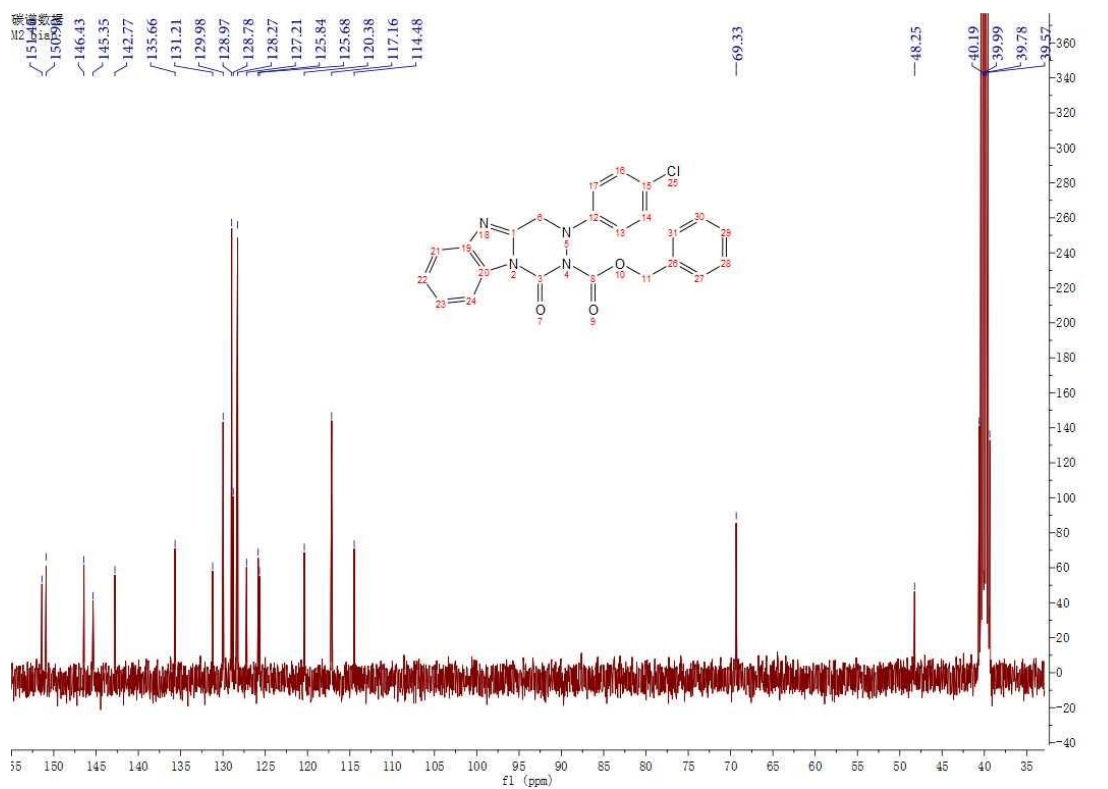

50. EI-MS spectra of compound **4m**

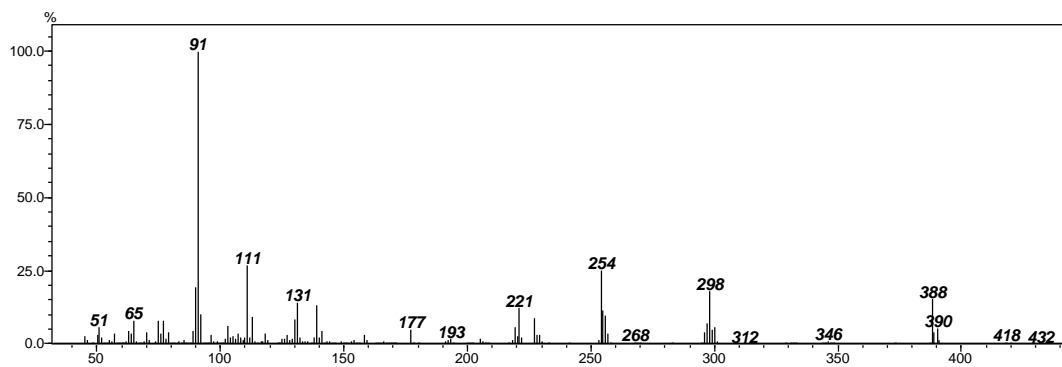

## 51. FT-IR spectra of compound 4m

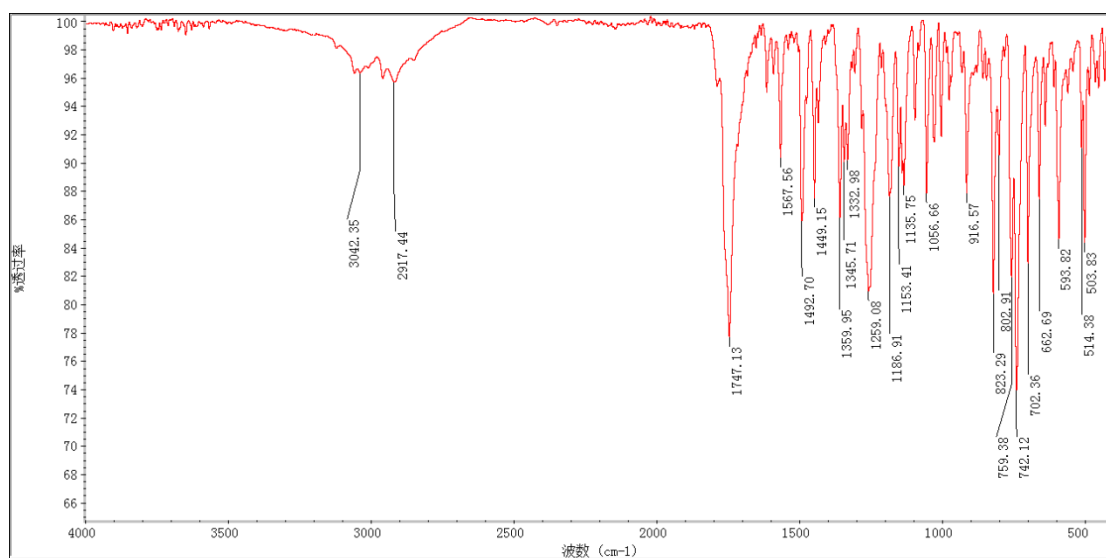

## 52. <sup>1</sup>H NMR spectra of compound 4n

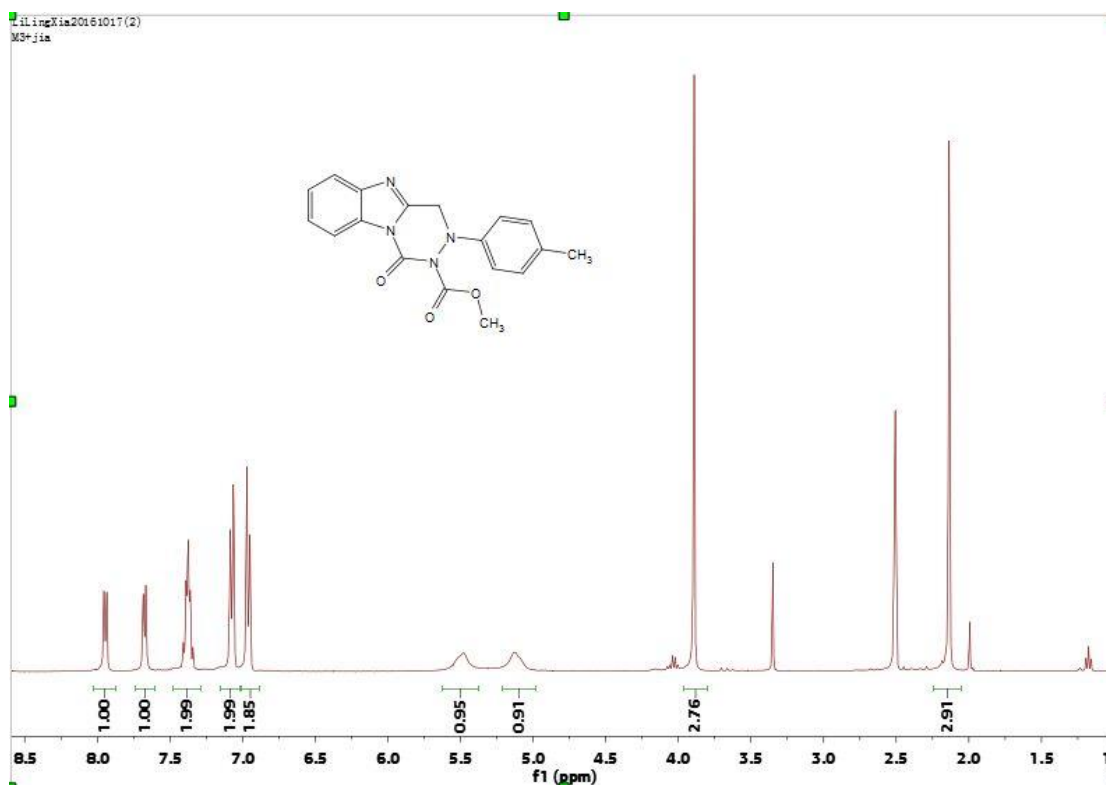

53.  $^{13}\text{C}$  NMR spectra of compound **4n**

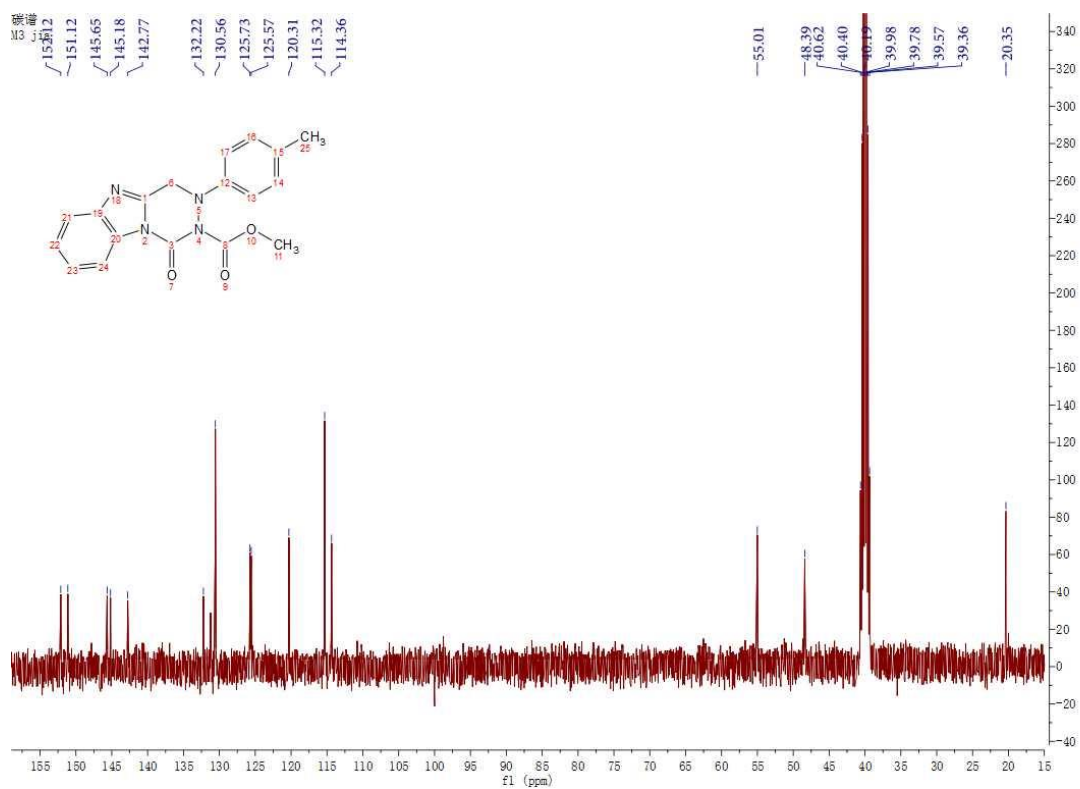

54. EI-MS spectra of compound **4n**

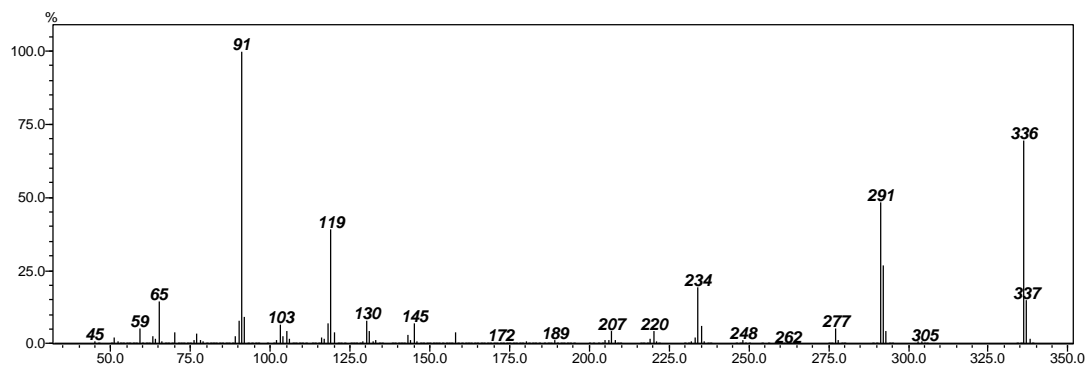

55. FT-IR spectra of compound **4n**

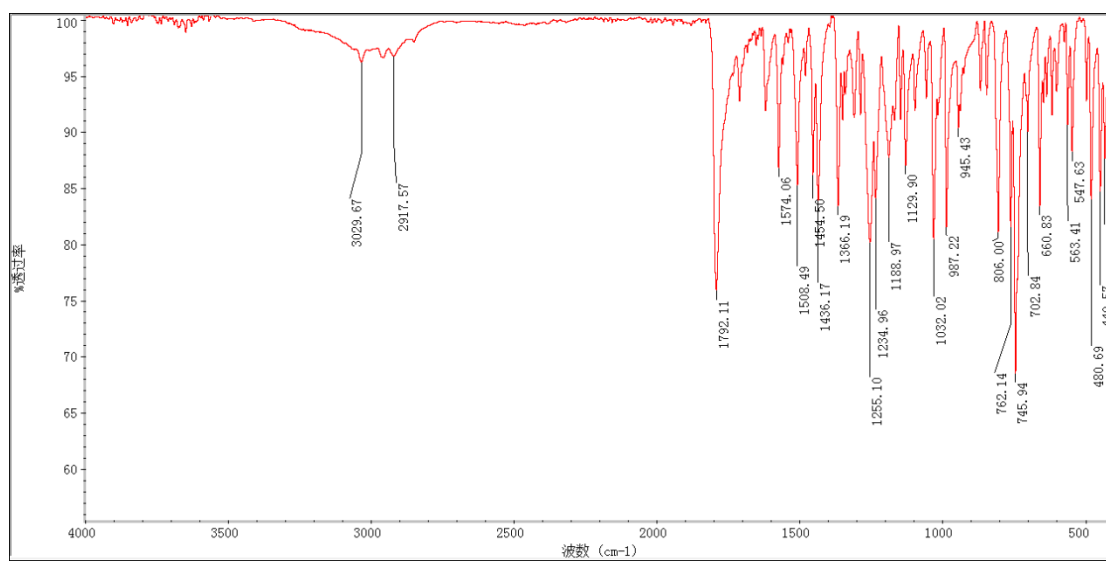

56. <sup>1</sup>H NMR spectra of compound **4o**

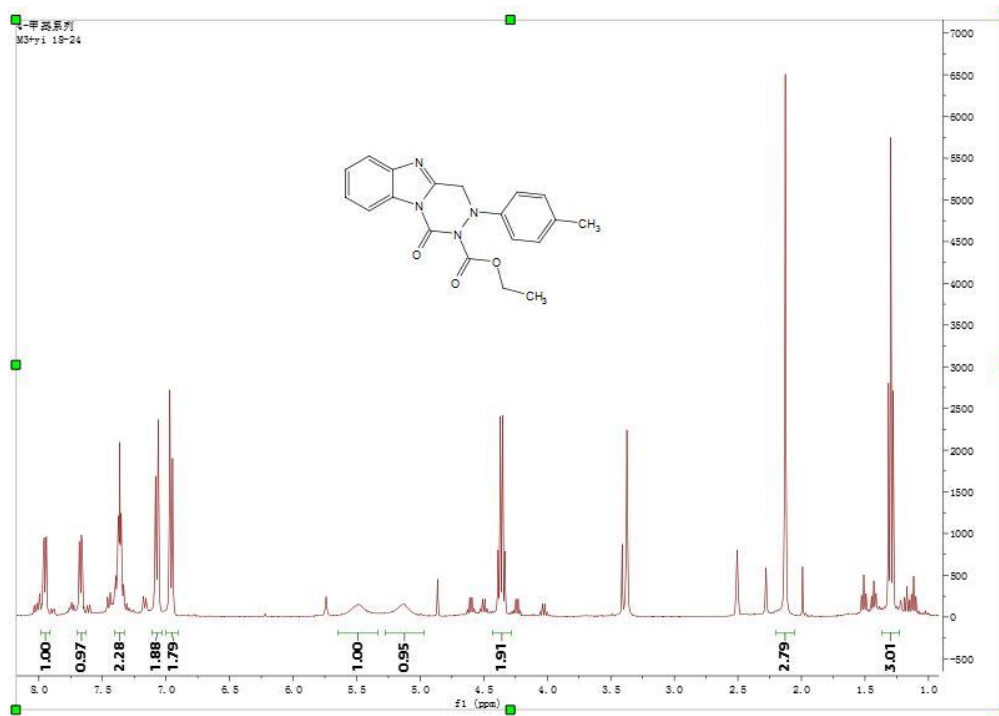

57.  $^{13}\text{C}$  NMR spectra of compound **4o**

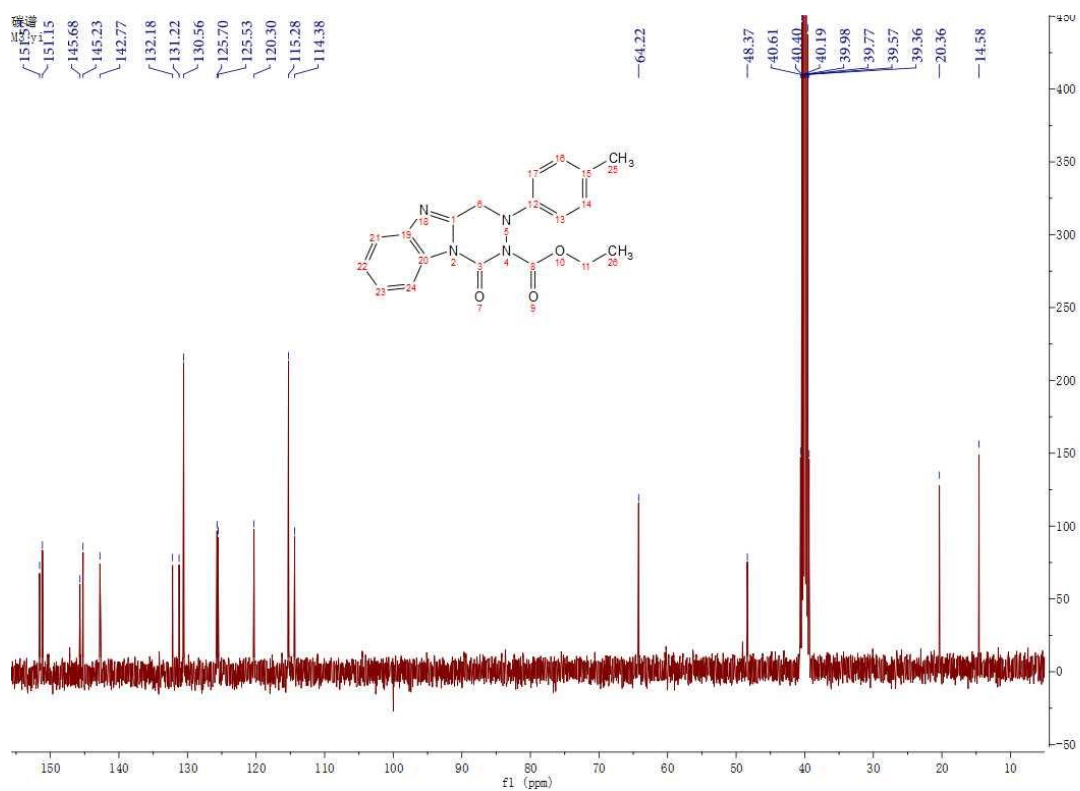

58. EI-MS spectra of compound **4o**

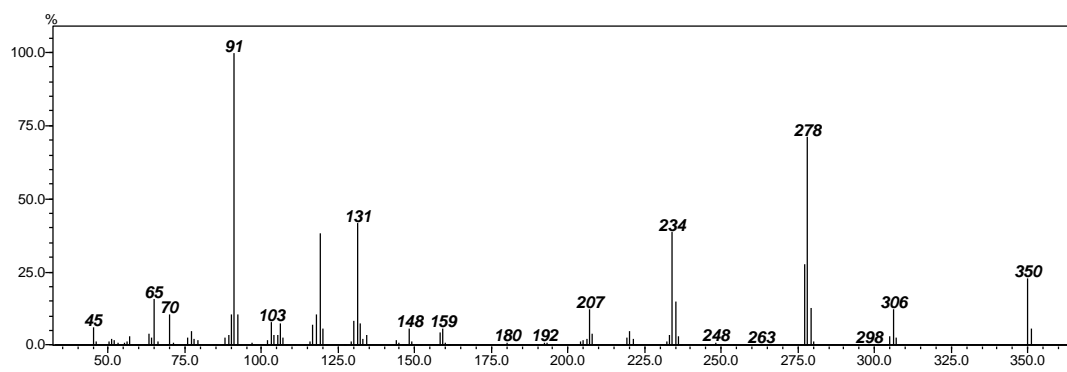



59. FT-IR spectra of compound 4o

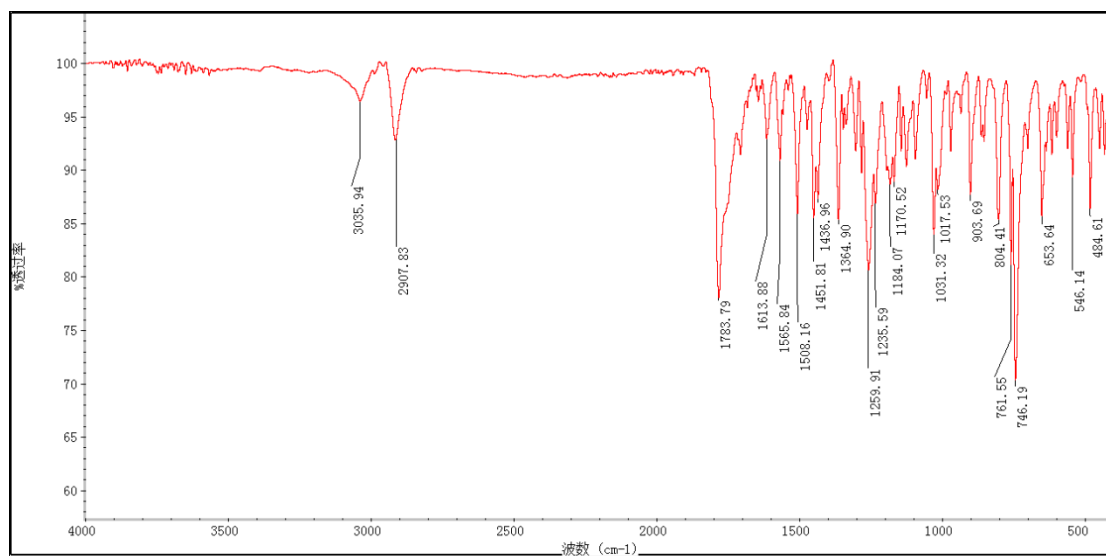

60. <sup>1</sup>H NMR spectra of compound 4p

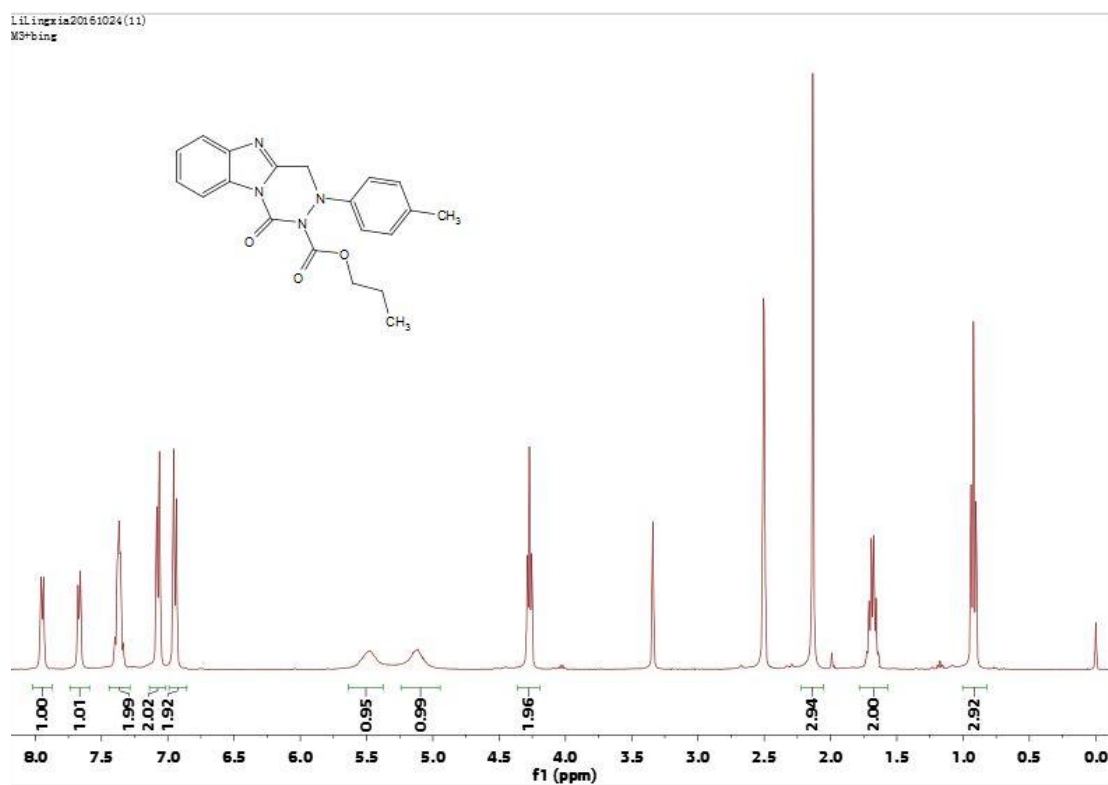

### 61. <sup>13</sup>C NMR spectra of compound 4p

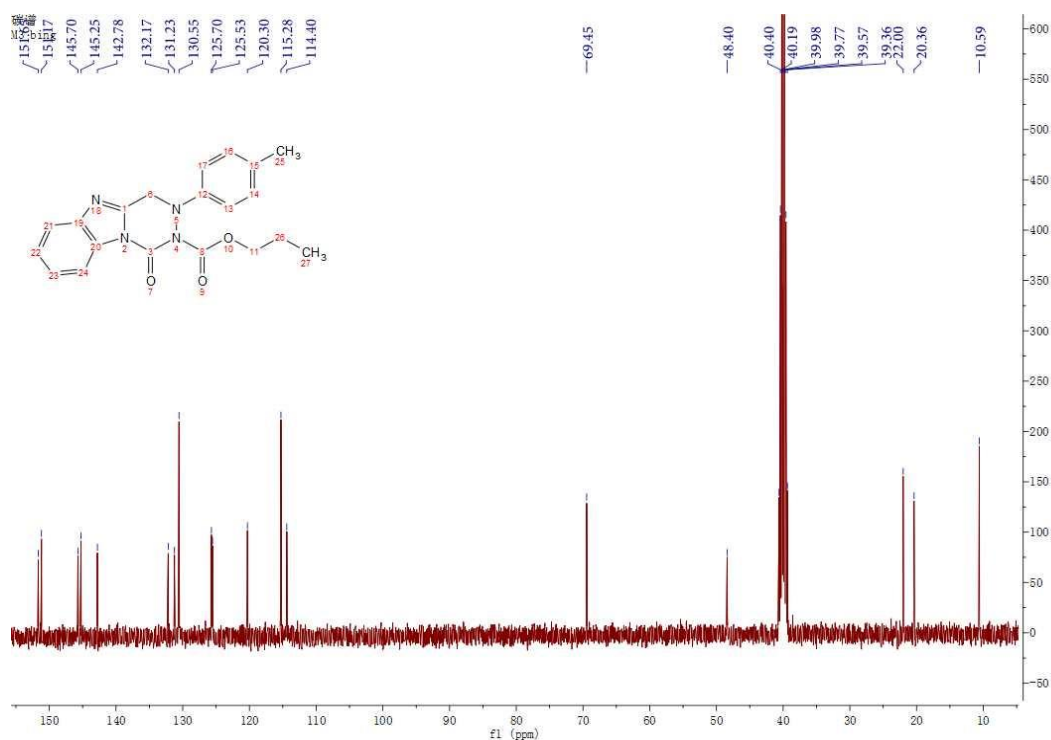

### 62. EI-MS spectra of compound 4p

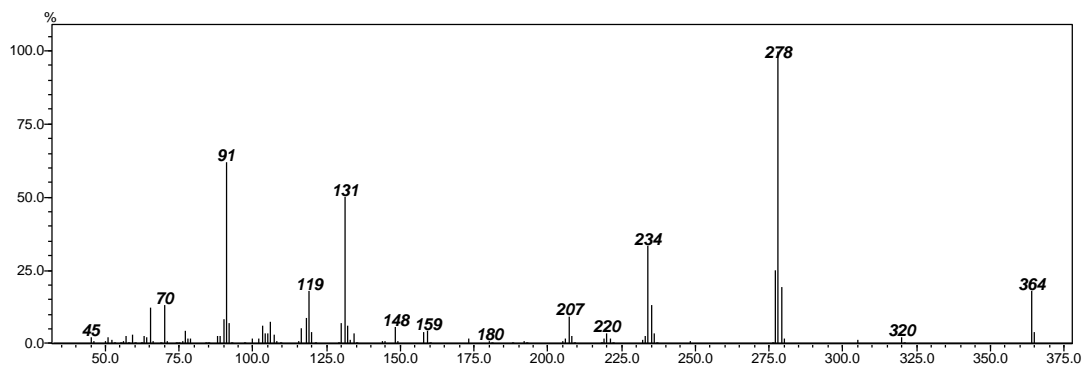

### 63. FT-IR spectra of compound 4p

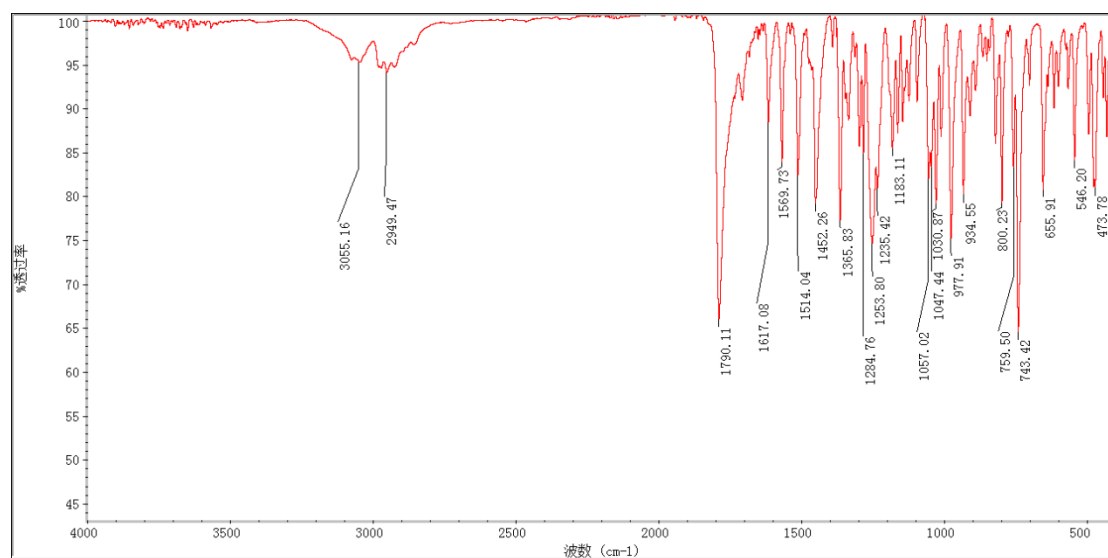

### 64. <sup>1</sup>H NMR spectra of compound 4q

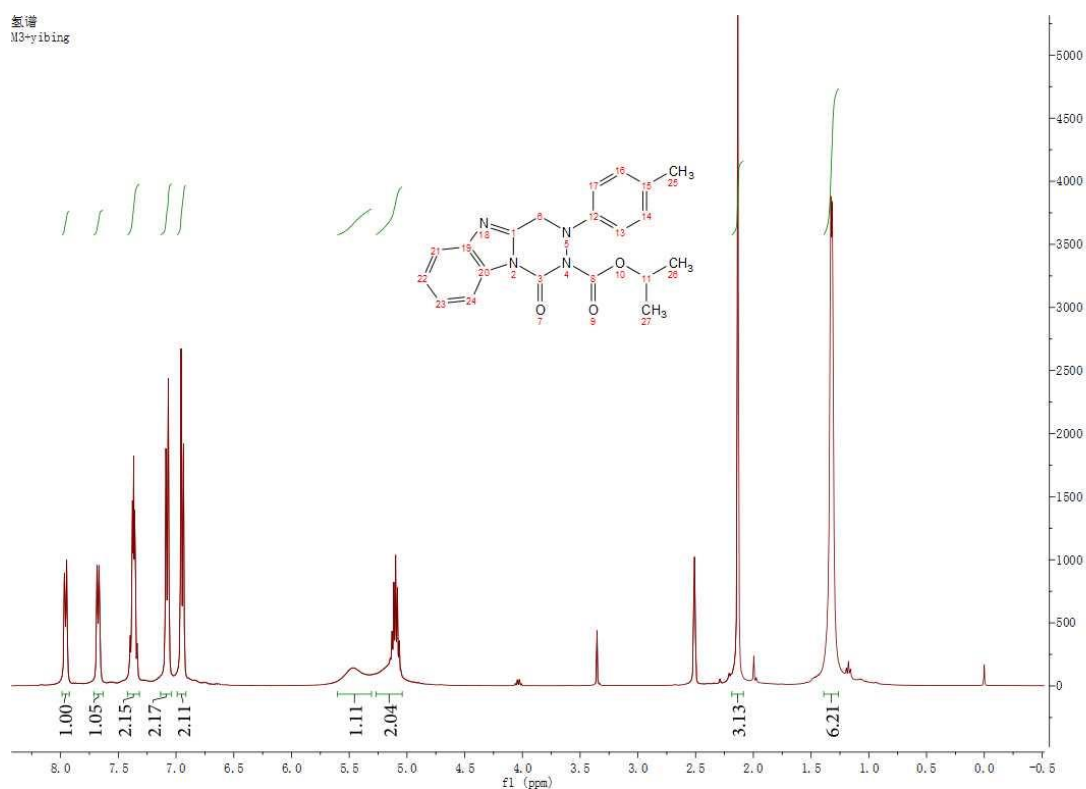

65.  $^{13}\text{C}$  NMR spectra of compound **4q**

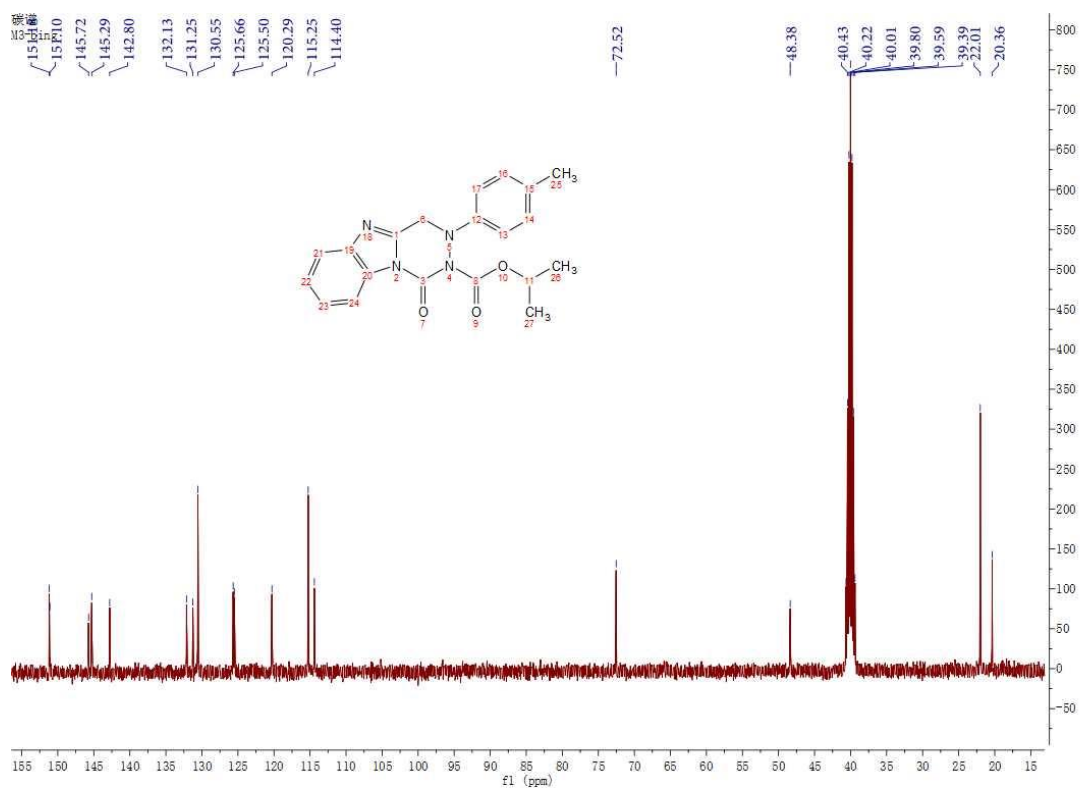

66. EI-MS spectra of compound **4q**

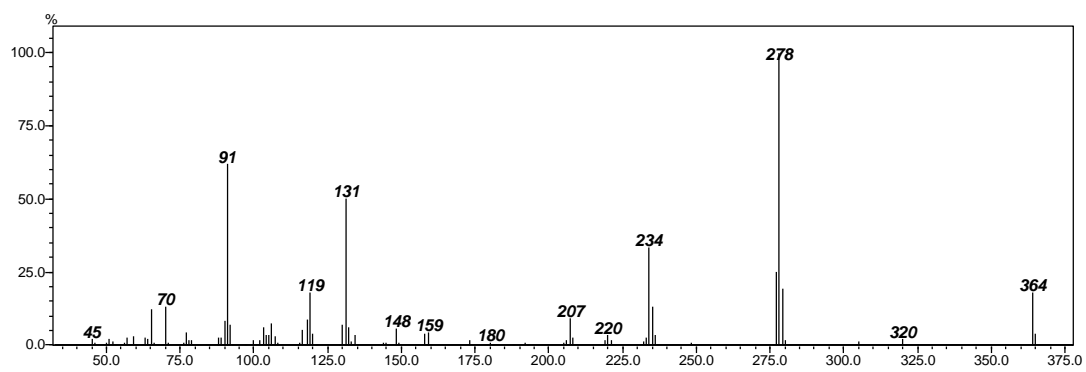

67. FT-IR spectra of compound 4q

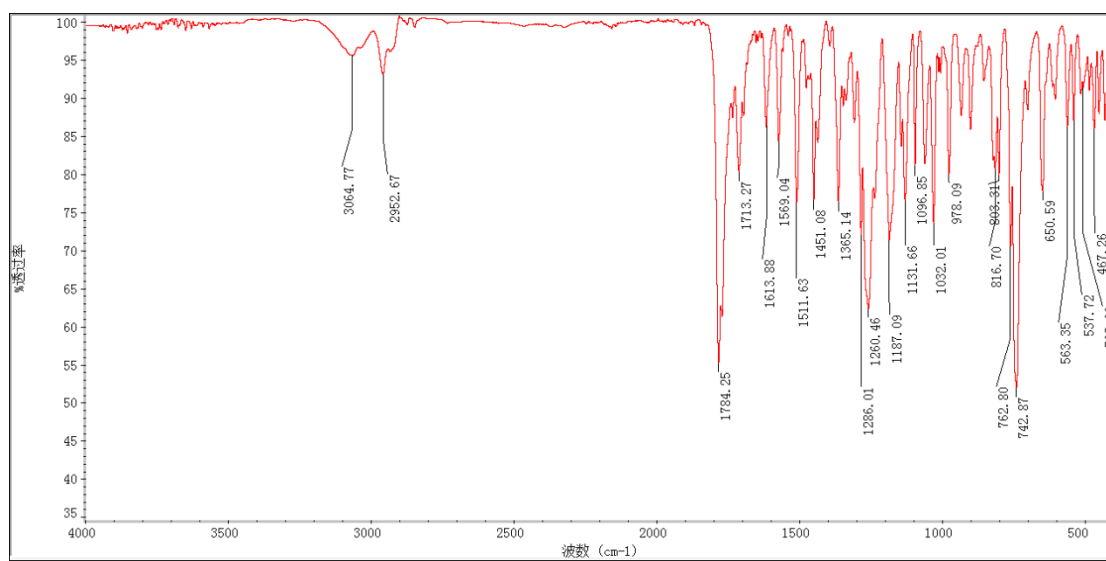

68. <sup>1</sup>H NMR spectra of compound 4r

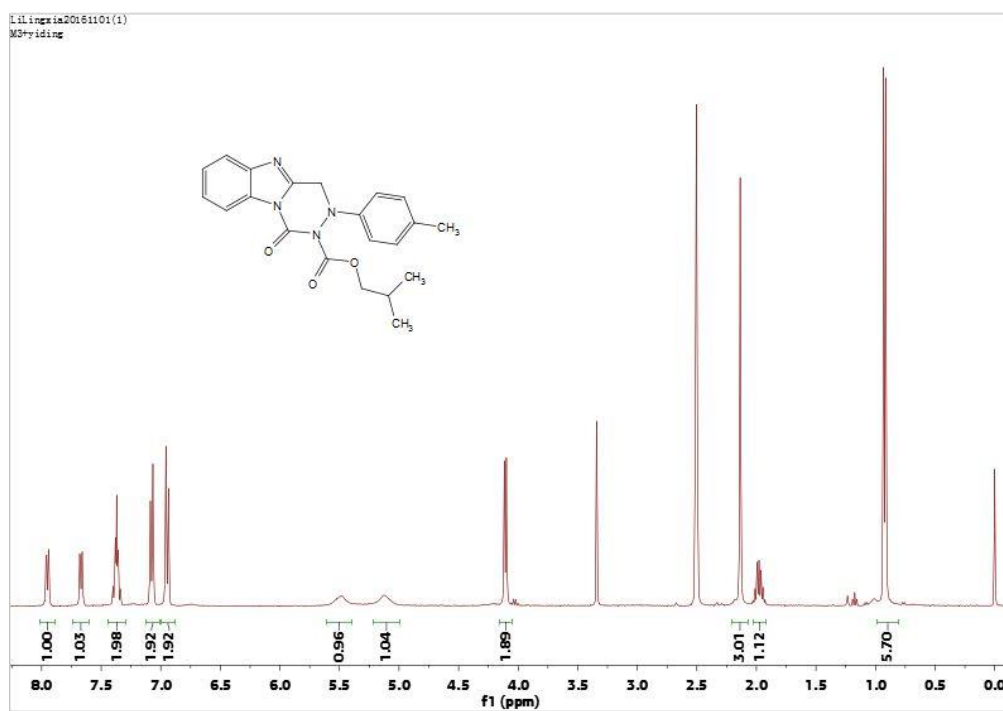

69.  $^{13}\text{C}$  NMR spectra of compound **4r**

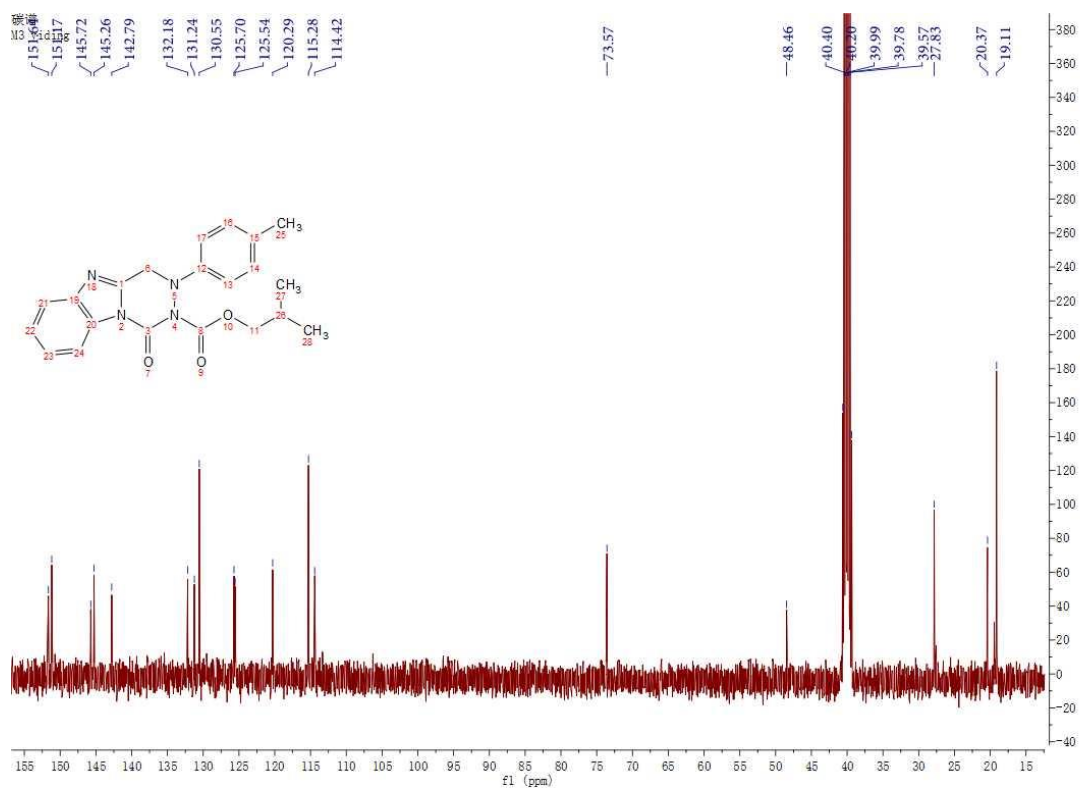

70. EI-MS spectra of compound **4r**

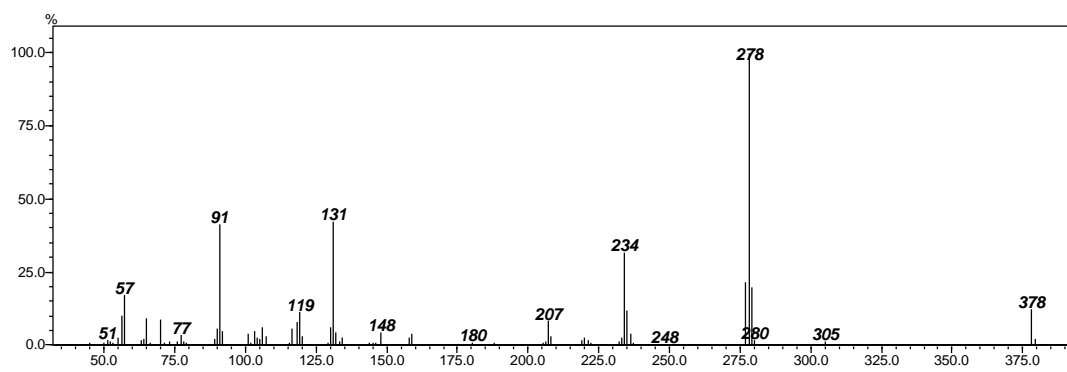

71. FT-IR spectra of compound **4r**

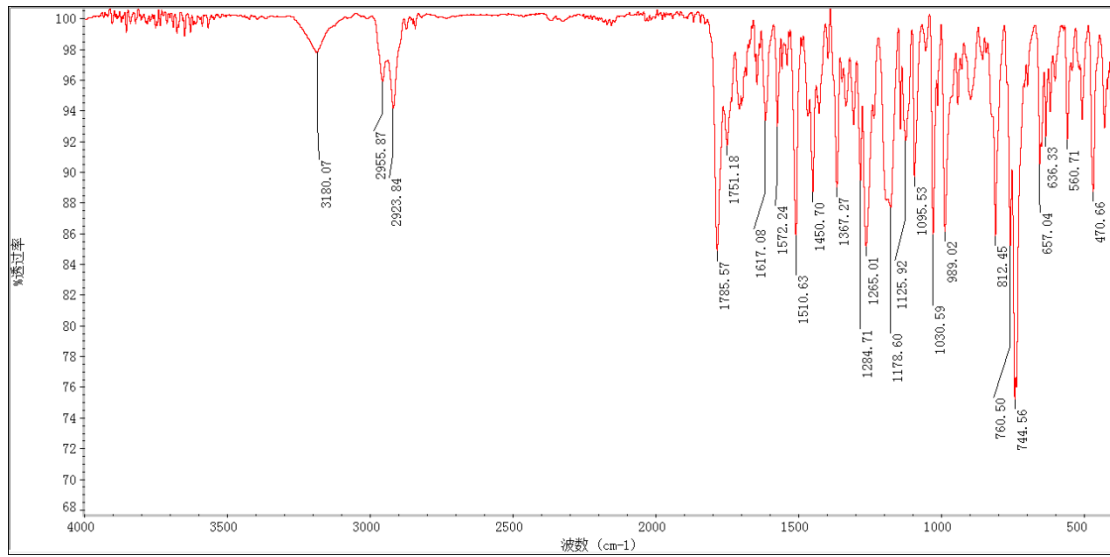

72. <sup>1</sup>H NMR spectra of compound 4s

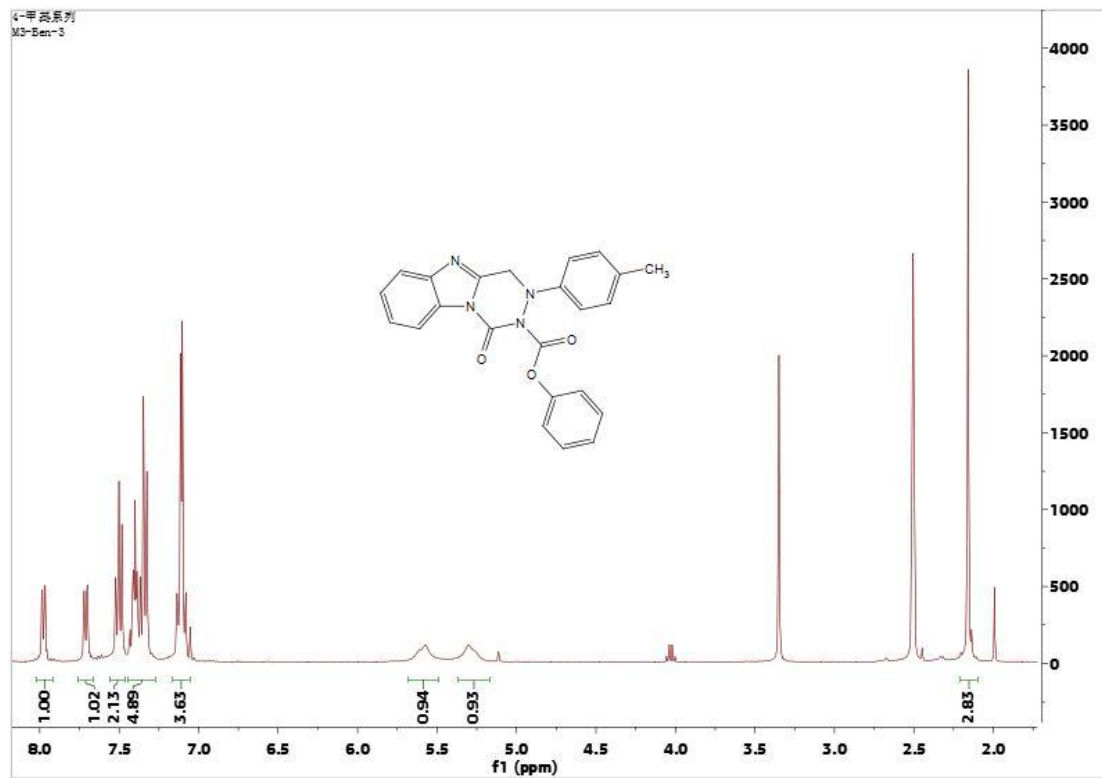

73. <sup>13</sup>C NMR spectra of compound 4s

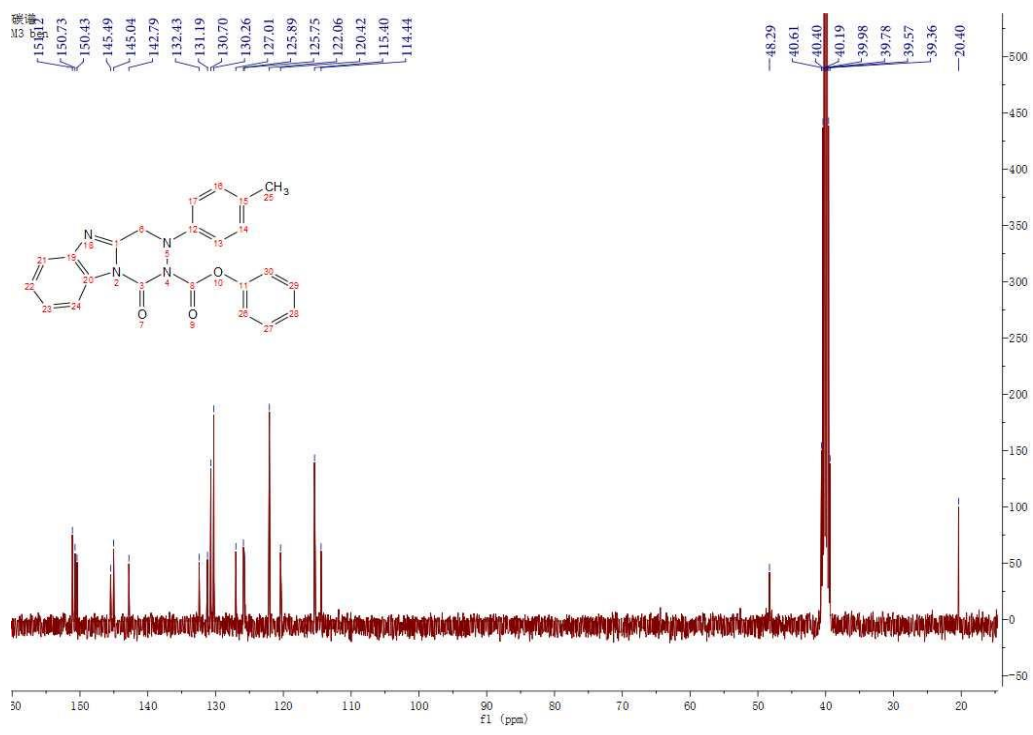

74. EI-MS spectra of compound 4s

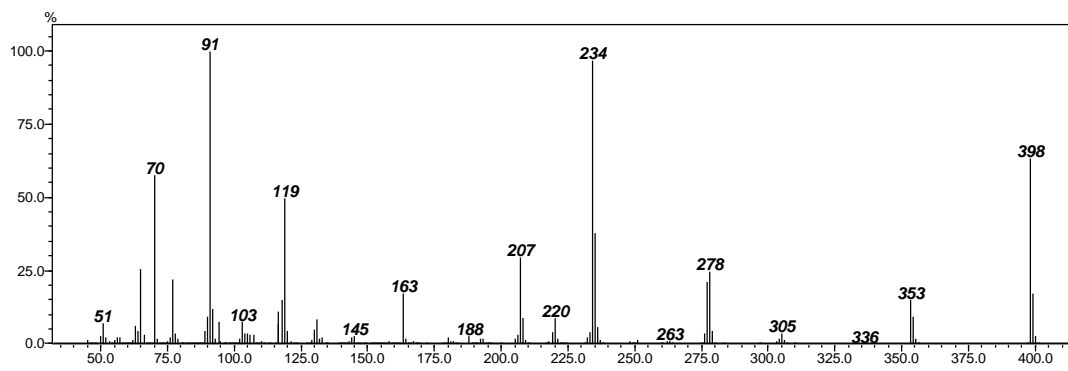



75. FT-IR spectra of compound 4s

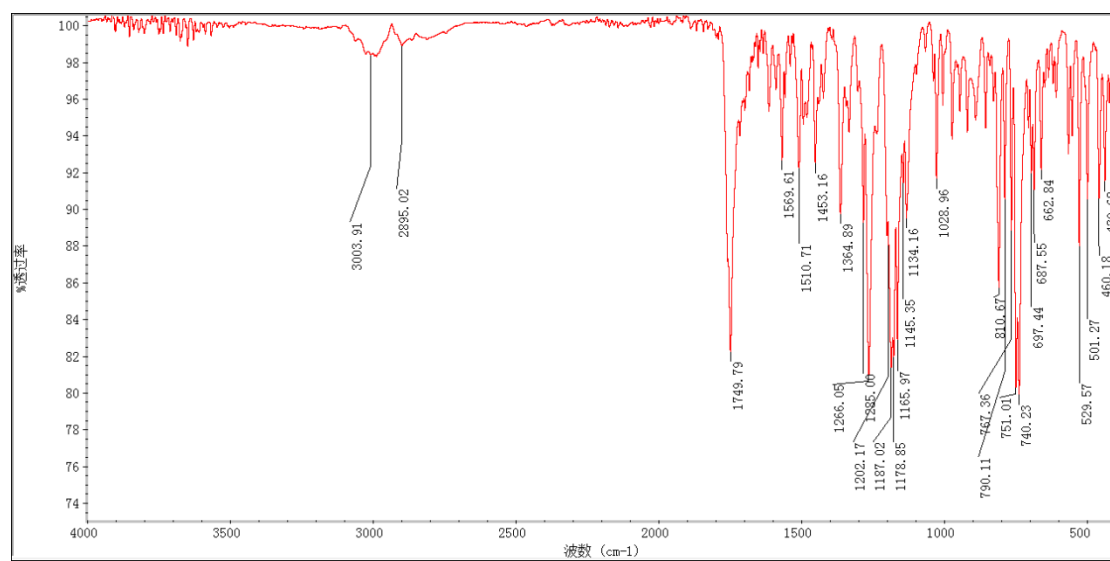

76. <sup>1</sup>H NMR spectra of compound 4t

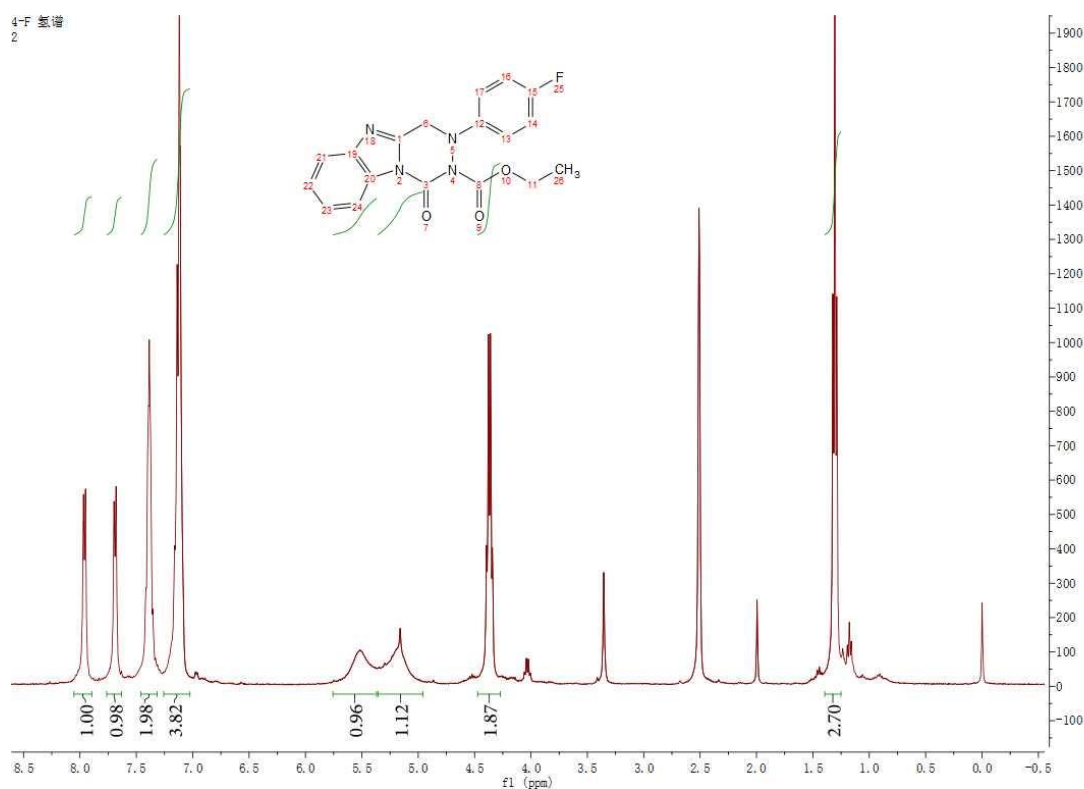

77.  $^{13}\text{C}$  NMR spectra of compound **4t**

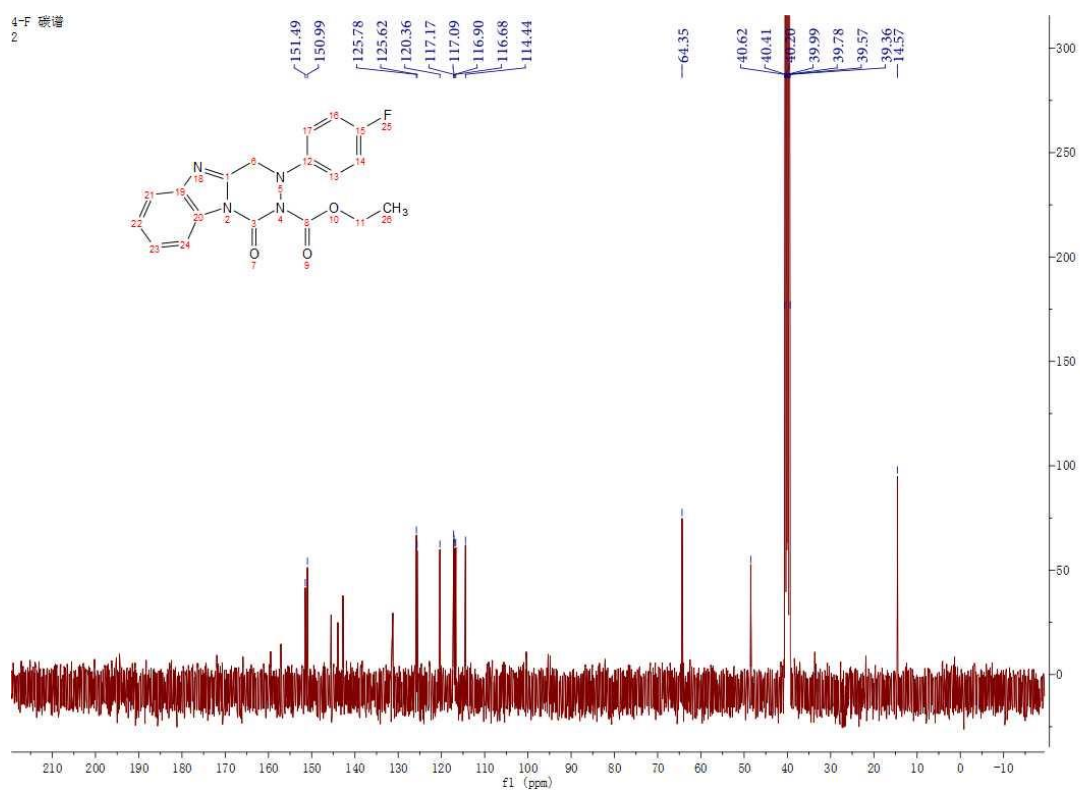

78. EI-MS spectra of compound **4t**

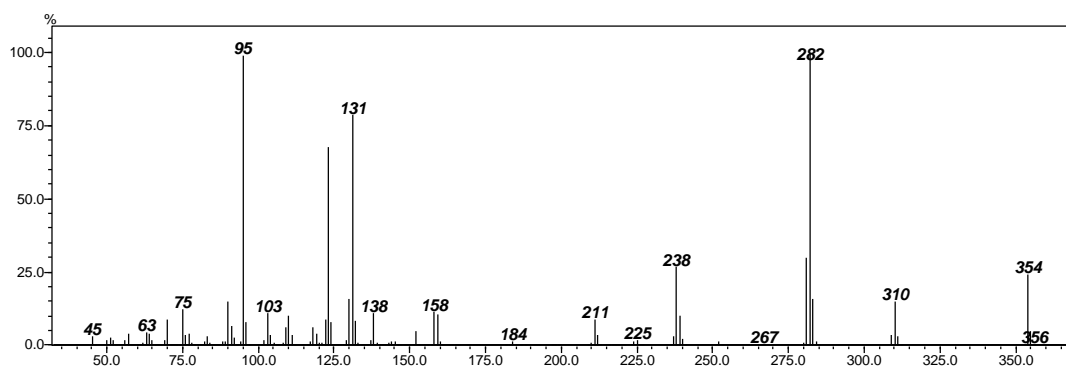

79. FT-IR spectra of compound **4t**

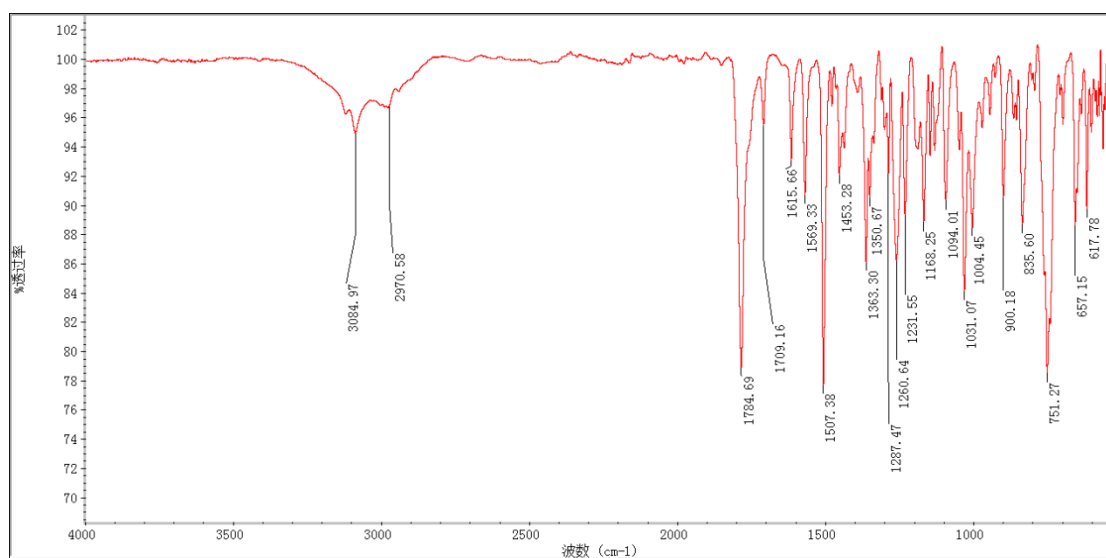

80. <sup>1</sup>H NMR spectra of compound **4u**

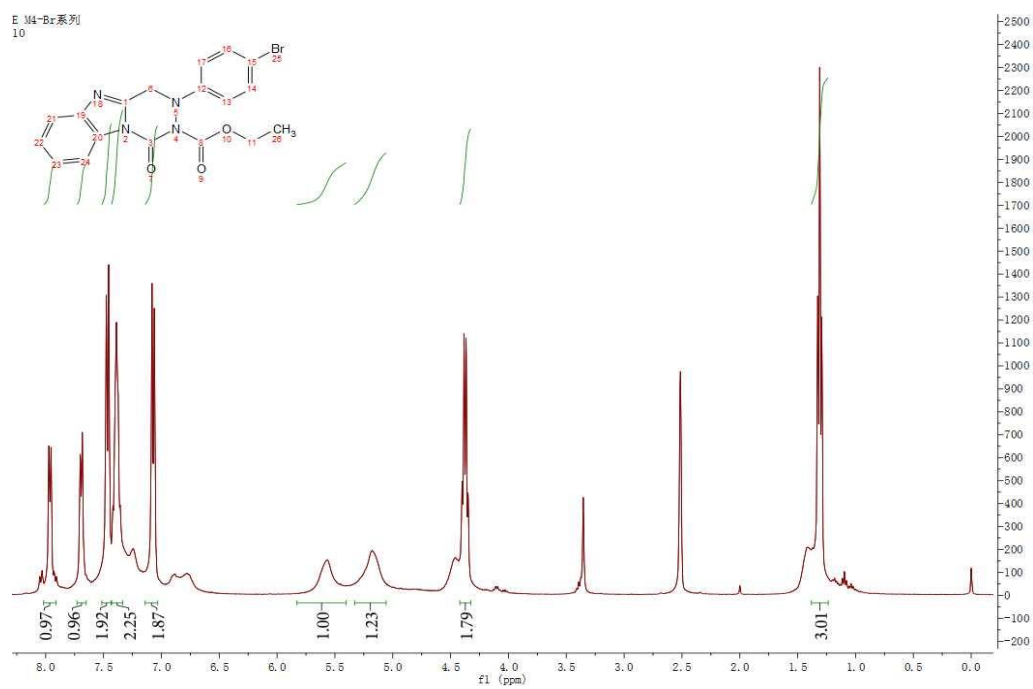

81.  $^{13}\text{C}$  NMR spectra of compound **4u**

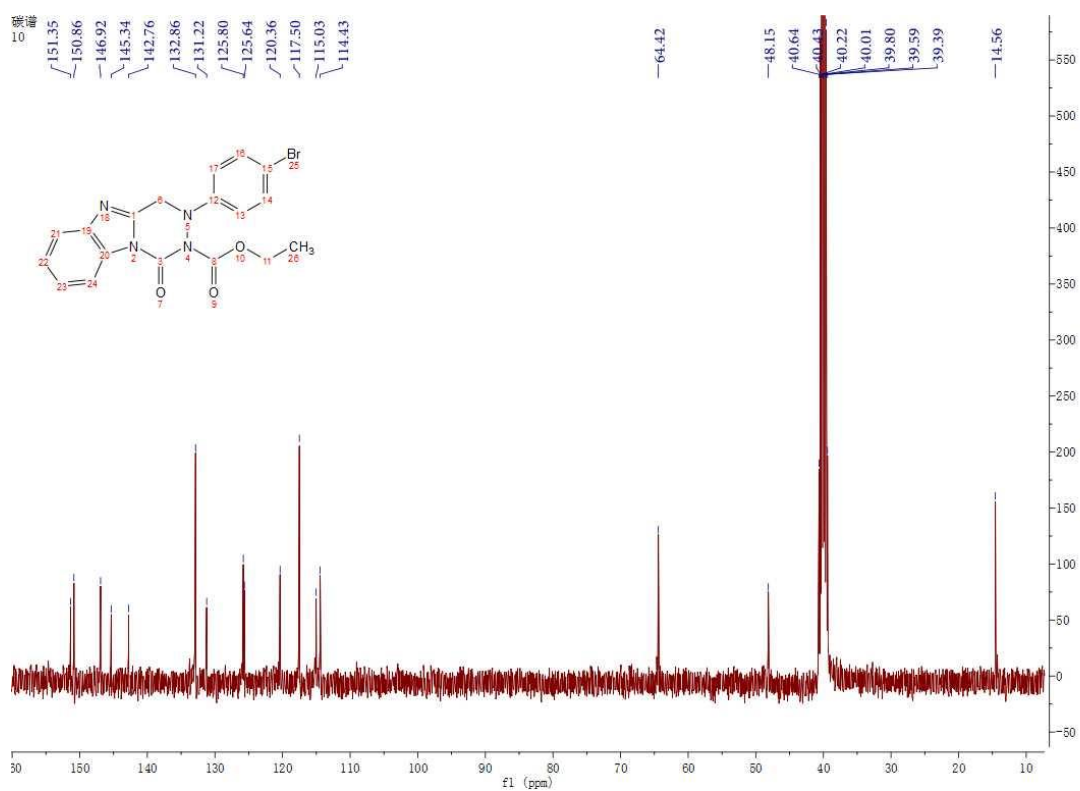

82. EI-MS spectra of compound **4u**

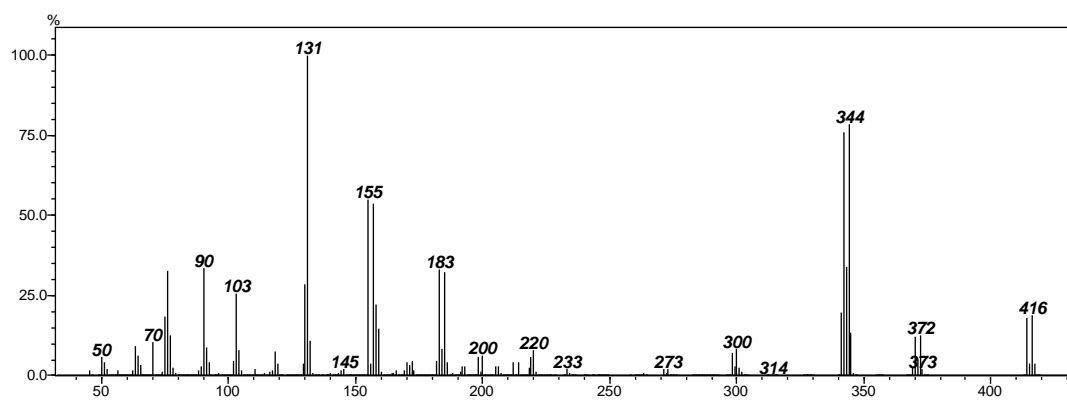

83. FT-IR spectra of compound 4u

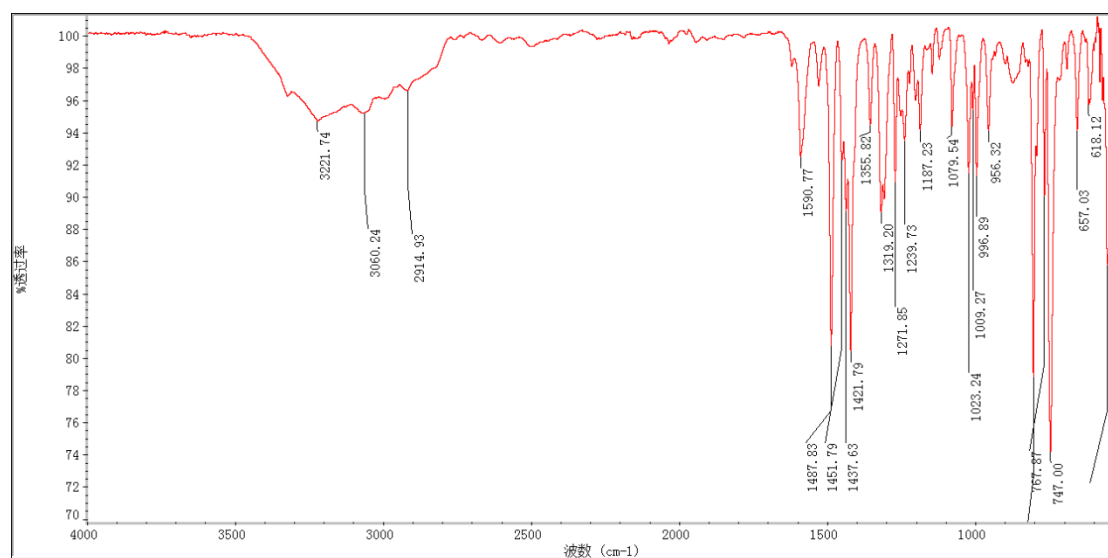

84. <sup>1</sup>H NMR spectra of compound 4v

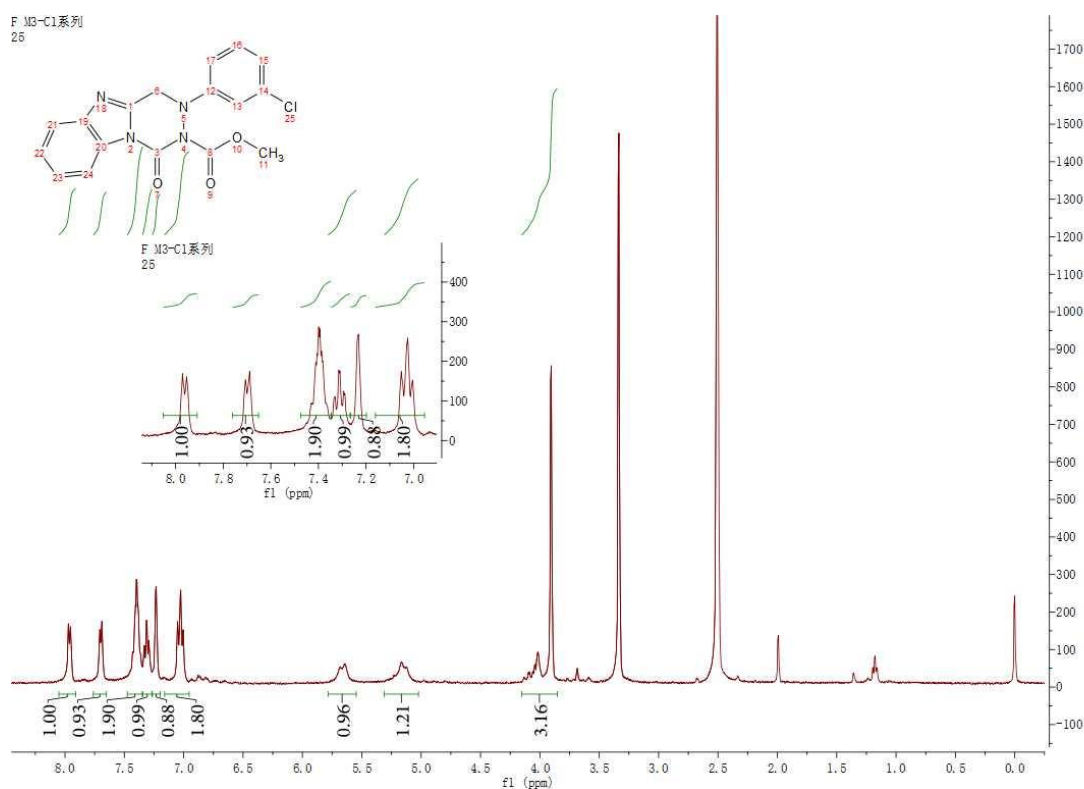

85. <sup>13</sup>C NMR spectra of compound 4v

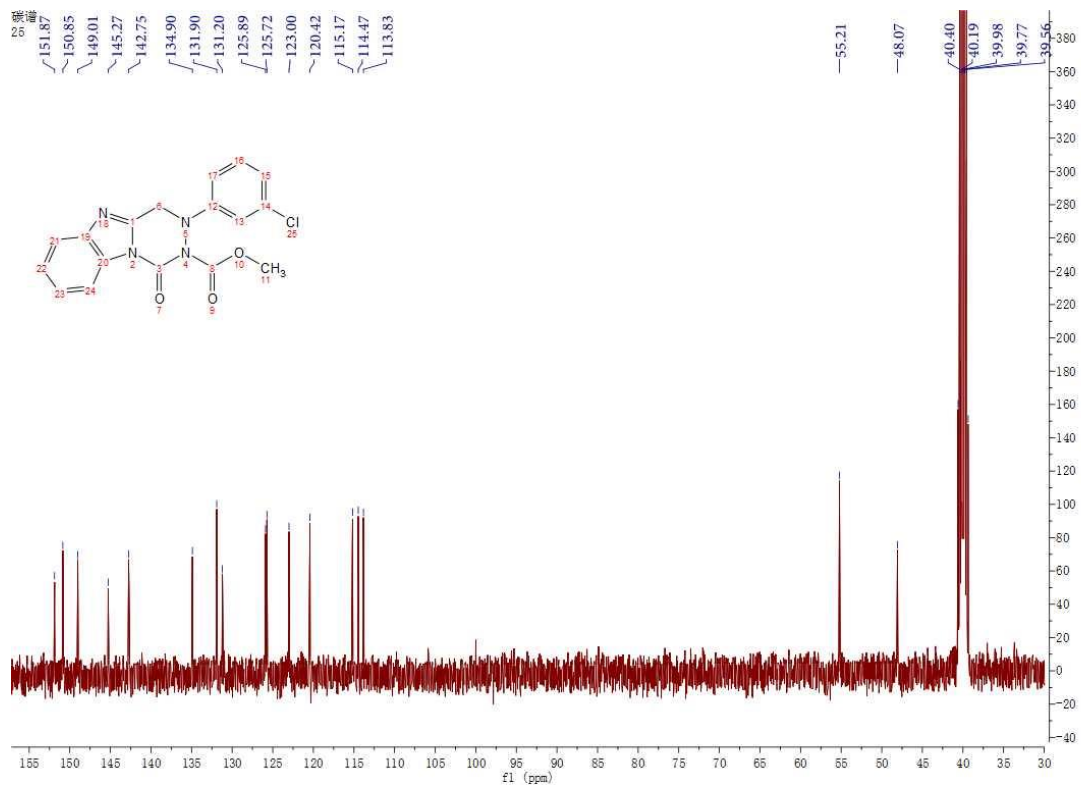

86. EI-MS spectra of compound 4v

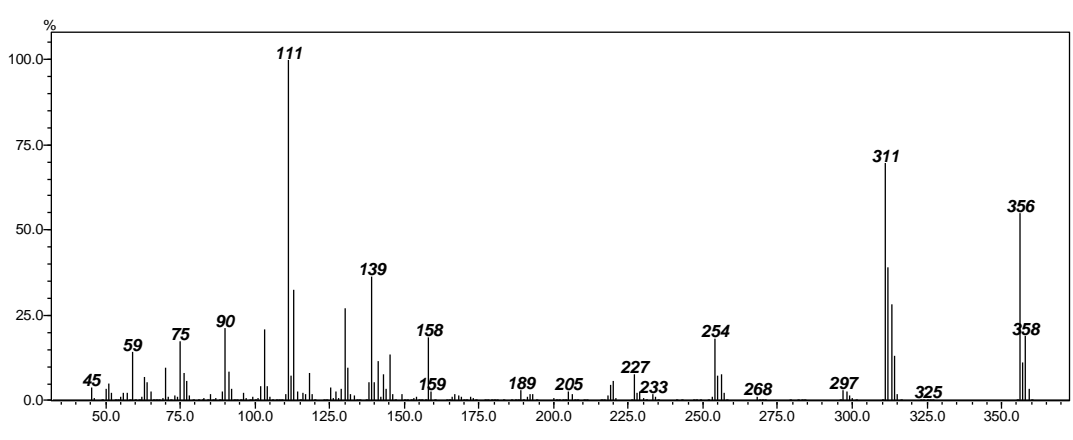

87. FT-IR spectra of compound 4v

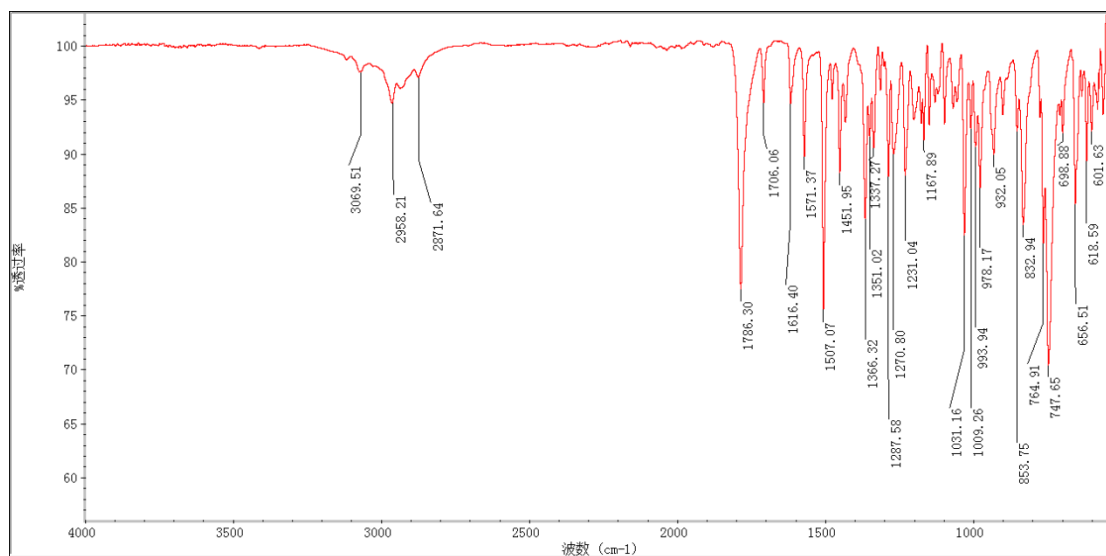

88. <sup>1</sup>H NMR spectra of compound 4w

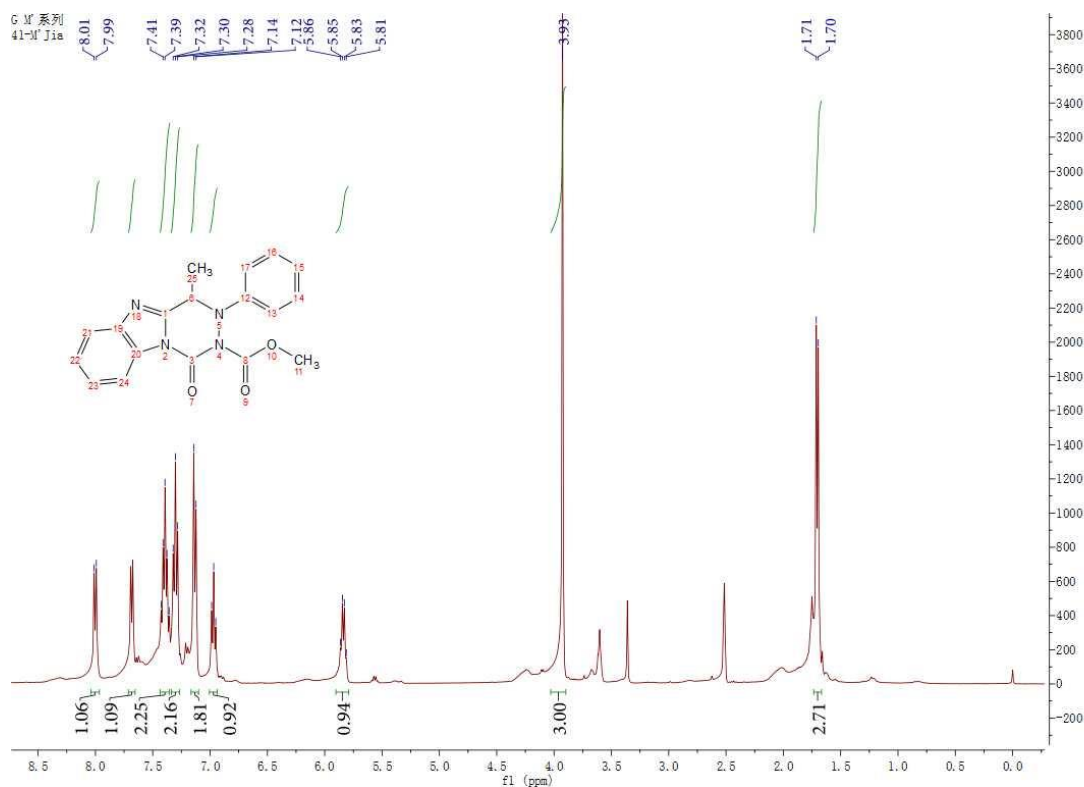

89.  $^{13}\text{C}$  NMR spectra of compound 4w

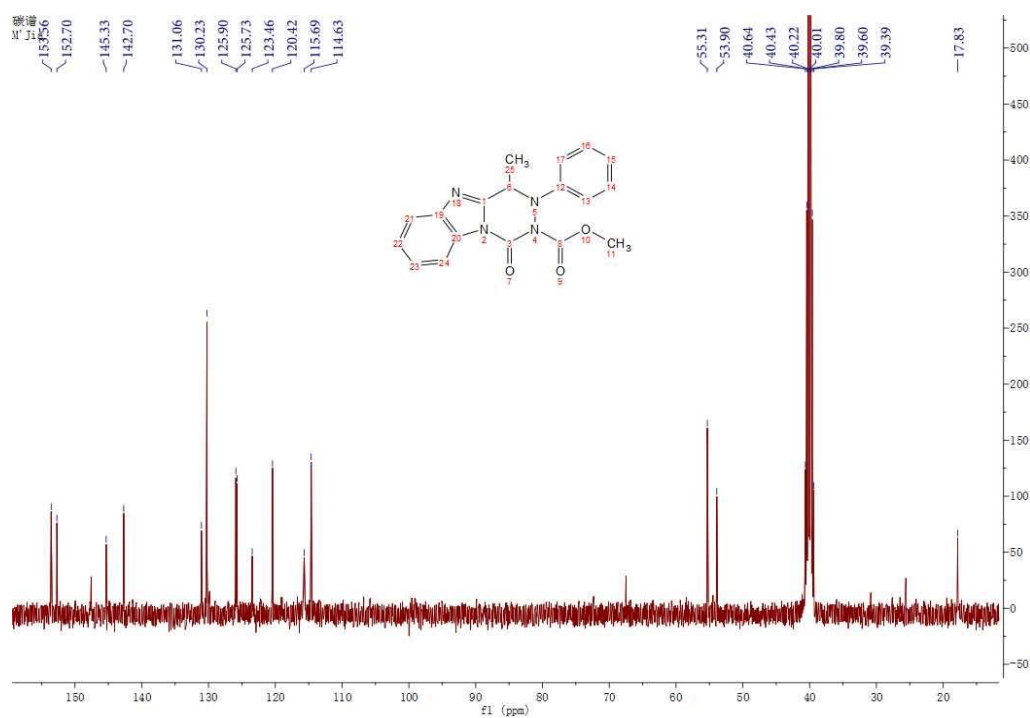

90. EI-MS spectra of compound 4w

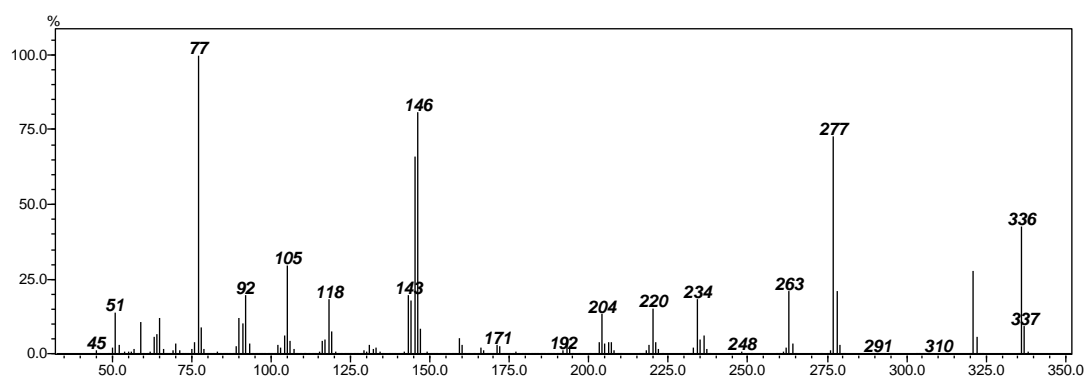



91. FT-IR spectra of compound 4w

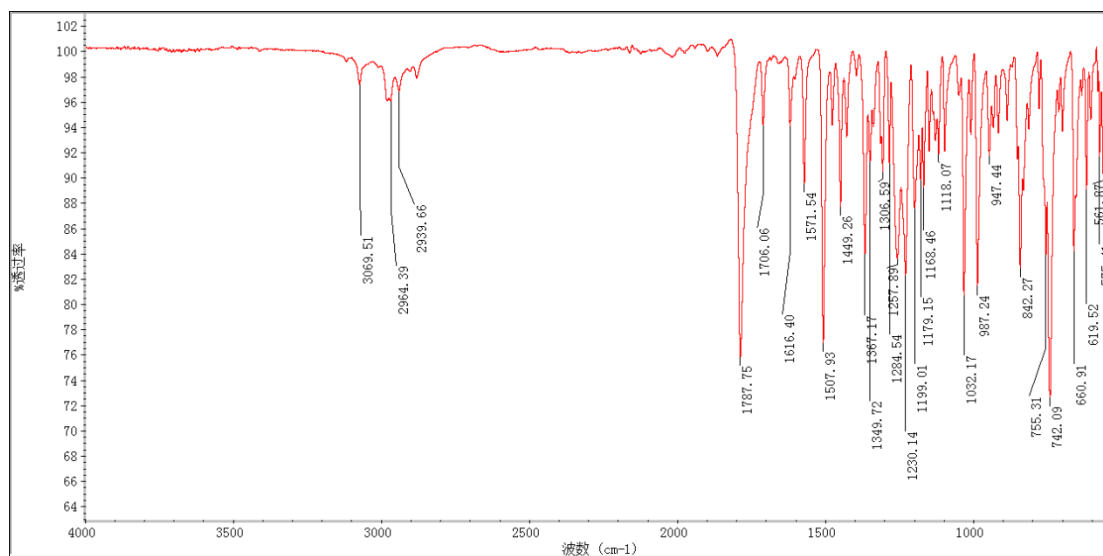

92. Selected geometric parameters of compound 4n.

| Bond Lengths |            |          |            |
|--------------|------------|----------|------------|
| Bond         | Dist. (Å)  | Bond     | Dist. (Å)  |
| O1–C9        | 1.202(2)   | C1–C2    | 1.396(3)   |
| O2–C10       | 1.190(2)   | C1–C6    | 1.397(3)   |
| O3–C10       | 1.327(2)   | C2–C3    | 1.377(3)   |
| O3–C11       | 1.460(3)   | C3–C4    | 1.395(3)   |
| N1–C1        | 1.410(2)   | C4–C5    | 1.390(3)   |
| N1–C7        | 1.293(2)   | C5–C6    | 1.391(3)   |
| N2–C6        | 1.406(2)   | C7–C8    | 1.490(2)   |
| N2–C7        | 1.401(2)   | C12–C13  | 1.390(3)   |
| N2–C9        | 1.402(2)   | C12–C17  | 1.398(3)   |
| N3–N4        | 1.423(2)   | C13–C14  | 1.394(3)   |
| N3–C8        | 1.471(2)   | C14–C15  | 1.390(3)   |
| N3–C12       | 1.440(2)   | C15–C16  | 1.390(3)   |
| N4–C9        | 1.408(2)   | C16–C17  | 1.389(3)   |
| N4–C10       | 1.417(2)   | C15–C18  | 1.513(3)   |
| Bond Angles  |            |          |            |
| Angle        | (°)        | Angle    | (°)        |
| C10–O3–C11   | 116.59(16) | N1–C7–N2 | 114.06(13) |
| C1–N1–C7     | 104.51(14) | N1–C7–C8 | 131.16(14) |

|           |            |             |            |
|-----------|------------|-------------|------------|
| C6–N2–C7  | 105.60(13) | N2–C7–C8    | 114.78(14) |
| C6–N2–C9  | 128.08(13) | N3–C8–C7    | 107.83(12) |
| C7–N2–C9  | 125.77(13) | O1–C9–N2    | 122.52(15) |
| N4–N3–C8  | 109.18(12) | O1–C9–N4    | 125.60(17) |
| N4–N3–C12 | 112.75(12) | N2–C9–N4    | 111.86(13) |
| C8–N3–C12 | 118.51(13) | O2–C10–O3   | 126.63(17) |
| N3–N4–C9  | 119.26(14) | O2–C10–N4   | 123.85(16) |
| N3–N4–C10 | 118.07(13) | O3–C10–N4   | 109.53(14) |
| C9–N4–C10 | 122.54(13) | N3–C12–C13  | 121.63(15) |
| N1–C1–C2  | 128.83(17) | N3–C12–C17  | 120.24(14) |
| N1–C1–C6  | 111.04(15) | C13–C12–C17 | 118.00(14) |
| C2–C1–C6  | 120.12(16) | C12–C13–C14 | 120.41(17) |
| C1–C2–C3  | 117.69(19) | C13–C14–C15 | 122.23(18) |
| C2–C3–C4  | 121.5(2)   | C14–C15–C16 | 116.66(16) |
| C3–C4–C5  | 122.05(18) | C14–C15–C18 | 122.36(16) |
| C4–C5–C6  | 115.81(18) | C16–C15–C18 | 120.98(17) |
| N2–C6–C1  | 104.76(13) | C15–C16–C17 | 122.10(17) |
| N2–C6–C5  | 132.38(17) | C12–C17–C16 | 120.59(16) |
| C1–C6–C5  | 122.84(17) |             |            |

93. Hydrogen bonding data for compound **4n** (Å, °).

| D–H...A                  | d(D–H) | d(H...A) | d(D...A) | ∠(DHA) |
|--------------------------|--------|----------|----------|--------|
| C8–H8B...O3 <sup>a</sup> | 0.9700 | 2.500    | 3.385(3) | 152.00 |
| C17–H17...N4             | 0.9300 | 2.4500   | 2.761(3) | 100    |

Symmetry code for compound **4n**: (a)  $-x, -y, -z$ .

94. Selected distances between hydrogen and carbon atoms for compound **4n** (Å).

| Bond     | Dist. (Å)  | Bond     | Dist. (Å)  |
|----------|------------|----------|------------|
| H3...C12 | 3.4404(23) | H4...C12 | 3.5022(26) |
| H3...C13 | 3.8177(27) | H4...C13 | 3.1355(26) |
| H3...C14 | 3.8124(31) | H4...C14 | 3.1414(26) |
| H3...C15 | 3.4249(26) | H4...C15 | 3.5343(29) |
| H3...C16 | 2.9135(24) | H4...C16 | 3.8278(32) |

---

|          |            |          |            |
|----------|------------|----------|------------|
| H3...C17 | 2.8950(24) | H4...C17 | 3.8172(29) |
|----------|------------|----------|------------|

---
